# Supplementary material
Source: PubMed Central journal article supplement (PMC3267861)
Supplement: NIHMS341499-supplement-01.pdf [file NIHMS341499-supplement-01.pdf]

**Supplemental Material, Table 1.** Definitions of the environment and environmentally attributable risk estimates for cancer

| Reference                                                                           | Year | Definition of environment                                                                                                                                                                                                                                                                                                                                                                                                                                                                                    | Narrow/<br>broad def. | Environmentally attributable<br>risk estimate for cancer                                                                                                                                     |
|-------------------------------------------------------------------------------------|------|--------------------------------------------------------------------------------------------------------------------------------------------------------------------------------------------------------------------------------------------------------------------------------------------------------------------------------------------------------------------------------------------------------------------------------------------------------------------------------------------------------------|-----------------------|----------------------------------------------------------------------------------------------------------------------------------------------------------------------------------------------|
| Higginson & Oettlé (1)                                                              | 1960 | All exogenous factors that impinge on human health - physical, biological, cultural or chemical.                                                                                                                                                                                                                                                                                                                                                                                                             | Broad                 | 70-80%                                                                                                                                                                                       |
| World Health Organization<br>(WHO) <i>Technical Report</i> (2)                      | 1964 | All extrinsic factors – including all environmental carcinogens (whether identified or not) as well as “modifying factors” that favor neoplasia of apparently intrinsic origin (e.g., hormonal imbalances, dietary deficiencies, and metabolic defects).                                                                                                                                                                                                                                                     | Broad                 | >75% of human cancers are influenced by environmental factors                                                                                                                                |
| WHO (3)                                                                             | 1965 | Chemicals                                                                                                                                                                                                                                                                                                                                                                                                                                                                                                    | Narrow                | >50% of human cancers are due to environmental factors                                                                                                                                       |
| John Higginson (4)<br><i>International Agency for<br/>Research on Cancer (IARC)</i> | 1967 | Total environment – cultural as well as chemical.                                                                                                                                                                                                                                                                                                                                                                                                                                                            | Broad                 | 90% of cancers are due to environmental factors                                                                                                                                              |
| David B. Clayson (5)                                                                | 1967 | Strictly chemicals.                                                                                                                                                                                                                                                                                                                                                                                                                                                                                          | Narrow                | 4 out of 5 cancers in man have their origins in the environment                                                                                                                              |
| John Higginson (6)                                                                  | 1968 | Total environment.                                                                                                                                                                                                                                                                                                                                                                                                                                                                                           | Broad                 | 90% of cancers are due to environmental factors                                                                                                                                              |
| E. Boyland (7)                                                                      | 1969 | Includes only chemical agents.                                                                                                                                                                                                                                                                                                                                                                                                                                                                               | Narrow                | 90% of cancers due to chemical agents – “but we do not know how much is due to endogenous carcinogens and how much to environmental factors.”<br>10% due to viruses, genetics, and radiation |
| S.S. Epstein (8)                                                                    | 1969 | Chemical pollutants, including pollutants of air (fuel combustion, tobacco smoke), water (agricultural or industrial effluents), and food (additives, pesticides, and naturally-occurring plant or fungal poisons).                                                                                                                                                                                                                                                                                          | Narrow                | The majority of human cancers are probably due to chemical carcinogens in the environment.                                                                                                   |
| Robert J. C. Harris (9)                                                             | 1970 | Includes the “ <i>natural</i> external environment – sunlight, air, food and water, and to the cancers which are the result of known pollutants, whether these be general or occupational. There are other aspects of the external environment which are under individual control. ‘Cultural’ cancers, such as lung cancer from cigarette smoking, can be completely abolished. ‘Therapeutic’ cancers from diagnostic and remedial medicine are under surveillance.” Also includes the internal environment. | Broad                 | 80-90% of cancers are due to the environment                                                                                                                                                 |
| John Higginson (10)                                                                 | 1970 | Exogenous factors                                                                                                                                                                                                                                                                                                                                                                                                                                                                                            | Broad                 | 80-90%                                                                                                                                                                                       |
| Fox et al. (11)                                                                     | 1970 | Breaks environment into three categories: Biological, physical, and social.<br><i>Biological</i> : Compromises all the flora and fauna, including pathogenic parasites and many other disease agents<br><i>Physical</i> : Includes geology, geographic, and climatic and meteorological features.<br><i>Socioeconomic</i> : Includes man’s relation to his fellow man.                                                                                                                                       | Broad                 | ---                                                                                                                                                                                          |
| S. S. Epstein (12)                                                                  | 1970 | Chemicals in the air, water, and soil.                                                                                                                                                                                                                                                                                                                                                                                                                                                                       | Narrow                | ---                                                                                                                                                                                          |

| Reference                    | Year | Definition of environment                                                                                                                                                                                                                                                                                                                                                                                                                                                                                       | Narrow/<br>broad def. | Environmentally attributable<br>risk estimate for cancer                                                 |
|------------------------------|------|-----------------------------------------------------------------------------------------------------------------------------------------------------------------------------------------------------------------------------------------------------------------------------------------------------------------------------------------------------------------------------------------------------------------------------------------------------------------------------------------------------------------|-----------------------|----------------------------------------------------------------------------------------------------------|
| Denis P. Burkitt (13)        | 1971 | Atmosphere, radiation, infection, injury and contact with any substance either externally or through food or drink.                                                                                                                                                                                                                                                                                                                                                                                             | Broad                 | >80% of cancers are due to the environment                                                               |
| Dr. Benedetto Terracini (14) | 1972 | Air, the atmosphere in working and living surroundings, medicines and cosmetics, food, drink, consumer products, every substance that involves professional contact with it, tobacco smoke, and other substances consumed for pleasure, etc.                                                                                                                                                                                                                                                                    | Broad                 | >50% of tumors have exogenous causes and many of these are chemical in nature                            |
| W.C. Hueper (15)             | 1972 | Environmental carcinogens include "all animate and inanimate, natural and man-made agents having displayed carcinogenic properties when introduced into either man or animal by any route, and in any dose or form."<br>Includes certain parasites and viruses, numerous macromolecular carbon and silicon polymers, a few minerals and metals, aliphatic and aromatic chemicals, and several non-ionizing and ionizing radiations (ultra-violet radiation, x radiation, alpha-beta, and gamma radiation, etc.) | Broad                 | ---                                                                                                      |
| IARC (16)                    | 1972 | Did not report.                                                                                                                                                                                                                                                                                                                                                                                                                                                                                                 | ---                   | 80% of cancers have environmental causes                                                                 |
| IARC (17)                    | 1972 | Did not report.                                                                                                                                                                                                                                                                                                                                                                                                                                                                                                 | ---                   | 80% of cancers are related to the environment                                                            |
| Selikoff & Hammond (18)      | 1972 | Extrinsic factors – gives examples of tobacco smoking and occupational exposures.                                                                                                                                                                                                                                                                                                                                                                                                                               | Broad                 | 75 to 85% of all human cancers are derived from environmental causes                                     |
| R.C. Harris (19)             | 1973 | Environment may be categorized, for these purposes, as natural, cultural, occupational or therapeutic. <i>Cultural</i> : Under the control of the individual (i.e. smoking).                                                                                                                                                                                                                                                                                                                                    | Broad                 | 80-90% of cancers in man are directly caused by agents in his environment – both external and internal." |
| C. Heidelberger (20)         | 1973 | Chemicals in the air, water, food, and soil.                                                                                                                                                                                                                                                                                                                                                                                                                                                                    | Narrow                | 80-90% of all human cancers caused by chemicals                                                          |
| Robert Gillette (21)         | 1974 | Defines "environmental factors" ranging from radiation to synthetic chemicals.                                                                                                                                                                                                                                                                                                                                                                                                                                  | Narrow                | 60-90% cancers are believed to be caused by environmental factors                                        |
| S.S. Epstein (22)            | 1974 | Chemical, physical, or biological agents.                                                                                                                                                                                                                                                                                                                                                                                                                                                                       | Broad                 | 70-90% of all human cancers are environmentally caused                                                   |
| C. Heidelberger (23)         | 1975 | Including strictly chemicals.                                                                                                                                                                                                                                                                                                                                                                                                                                                                                   | Narrow                | 70-90% of all human cancers are environmentally caused                                                   |
| E.C. Hammond (24)            | 1975 | Cigarette smoking, occupational exposures, and various other chemicals and physical agents.                                                                                                                                                                                                                                                                                                                                                                                                                     | Broad                 | 85% or more of all human cancers are due to environmental factors                                        |
| A.L. Brown (25)              | 1976 | "That portion of the biosphere that makes up the air we breathe, the water we drink and the food we eat. I shall not be concerned with the broader aspects of 'environmental pollution' or the 'environs' in the general sense. Nor shall I consider occupational exposure."                                                                                                                                                                                                                                    | Narrow                | ---                                                                                                      |
| Richard Doll (26)            | 1976 | Includes radiation, chemical exposures, tobacco, alcohol, viruses and infections.                                                                                                                                                                                                                                                                                                                                                                                                                               | Broad                 | ---                                                                                                      |

| Reference                                                    | Year | Definition of environment                                                                                                                                                                                                                                                                                                                                                                                                                                                                                                                                                                                                                                                                               | Narrow/<br>broad def. | Environmentally attributable<br>risk estimate for cancer                                                                                                                                                                                                                                                                                        |
|--------------------------------------------------------------|------|---------------------------------------------------------------------------------------------------------------------------------------------------------------------------------------------------------------------------------------------------------------------------------------------------------------------------------------------------------------------------------------------------------------------------------------------------------------------------------------------------------------------------------------------------------------------------------------------------------------------------------------------------------------------------------------------------------|-----------------------|-------------------------------------------------------------------------------------------------------------------------------------------------------------------------------------------------------------------------------------------------------------------------------------------------------------------------------------------------|
| UK Department of Health & Social Security (27)               | 1976 | Chemical pollution                                                                                                                                                                                                                                                                                                                                                                                                                                                                                                                                                                                                                                                                                      | Narrow                | 85% of all cancers have environmental causes                                                                                                                                                                                                                                                                                                    |
| Higginson & Muir (28)                                        | 1976 | “In its widest sense, embracing not only carcinogens per se but also any exogenous stimulus. It therefore includes not only widespread exposures of a general nature, e.g., air, water and food pollutants, as well as more limited exposures resulting from the work environment, or habits of personal choice, e.g., smoking and drinking, but also general dietary patterns and lifestyle.”                                                                                                                                                                                                                                                                                                          | Broad                 | 60-90% of human cancers are of environmental origin.                                                                                                                                                                                                                                                                                            |
| J.H. Weisburger (29)                                         | 1976 | Describes environmental factors as chemicals, radiation, tobacco, and personal dietary habits.                                                                                                                                                                                                                                                                                                                                                                                                                                                                                                                                                                                                          | Broad                 | 80-90% of human cancers are due to environmental factors                                                                                                                                                                                                                                                                                        |
| John Higginson (30)                                          | 1976 | Used in the wide sense to include not only obvious air, water, food and other pollutants, but also general dietary patterns and personal habits.                                                                                                                                                                                                                                                                                                                                                                                                                                                                                                                                                        | Broad                 | Exogenous and environmental stimuli causing between 30-40% of human cancers have been identified in European and American industrial societies... there is evidence that between one-half to two-thirds of those cancers for which the etiology has not been yet established are directly or indirectly due to exogenous environmental factors. |
| R. Preussman (31)                                            | 1976 | Environmental chemicals.                                                                                                                                                                                                                                                                                                                                                                                                                                                                                                                                                                                                                                                                                | Narrow                | 60-99.9% of cancers are environmentally related                                                                                                                                                                                                                                                                                                 |
| John Higginson (32)                                          | 1976 | Categorizes the environment into the macro-environment and micro-environment.<br><i>Macro-environment:</i> “The individual’s total general environment, e.g. air and water pollution, general food supplies, etc. The individual cannot significantly modify the macro-environment, which is largely the responsibility of the appropriate governmental authorities.”<br><i>Micro-environment:</i> “The personal environment created by the individual. Includes cultural habits, e.g. cigarette smoking and individual drinking and eating habits. It may also include occupation where, however, the degree of individual control varies according to local political and socio-economic conditions.” | Broad                 | 85% of cancers are dependent directly or indirectly on environmental factors.                                                                                                                                                                                                                                                                   |
| Higginson & Muir (33)                                        | 1977 | Widespread general exposures of air and water pollution, the work environment, exposures resulting from personal choice such as smoking and drinking, and the diet.                                                                                                                                                                                                                                                                                                                                                                                                                                                                                                                                     | Broad                 | 80% (70-90%) of all cancers are of environmental origin                                                                                                                                                                                                                                                                                         |
| R. Train (34)                                                | 1977 | Some natural, such as sunlight or molds; some due to personal habits, such as cigarette smoking; and some due to carcinogens in air, water, and diet.                                                                                                                                                                                                                                                                                                                                                                                                                                                                                                                                                   | Broad                 | ---                                                                                                                                                                                                                                                                                                                                             |
| Wynder & Gori (35)<br><i>National Cancer Institute (NCI)</i> | 1977 | Environmental carcinogens either relate to lifestyle (tobacco, alcohol, sunlight, occupational exposure, nutrition) or general environmental factors (air and water pollution, drugs and food additives.)<br><i>Environmental carcinogens:</i> arising wholly or largely outside the host’s body.                                                                                                                                                                                                                                                                                                                                                                                                       | Broad                 | ---                                                                                                                                                                                                                                                                                                                                             |
| Sir Richard Doll (36)                                        | 1977 | Examples of environmental agents include sunlight, ‘Kangri’, reverse smoking, tobacco, aflatoxin, schistosomiasis, viruses, radiation and pollutants.                                                                                                                                                                                                                                                                                                                                                                                                                                                                                                                                                   | Broad                 | Can reduce age-specific incidence rates by at least 80 to 90%                                                                                                                                                                                                                                                                                   |

| Reference                                                                          | Year | Definition of environment                                                                                                                                                                                                                                                                        | Narrow/<br>broad def. | Environmentally attributable<br>risk estimate for cancer                                                                                                                        |
|------------------------------------------------------------------------------------|------|--------------------------------------------------------------------------------------------------------------------------------------------------------------------------------------------------------------------------------------------------------------------------------------------------|-----------------------|---------------------------------------------------------------------------------------------------------------------------------------------------------------------------------|
| C. Heidelberger (37)                                                               | 1977 | Chemicals, dietary factors, and ultraviolet radiation.                                                                                                                                                                                                                                           | Broad                 | 70-90% of all human cancers are environmentally caused                                                                                                                          |
| National Center for Health Statistics (38)                                         | 1977 | Includes occupational exposures, pollution of water and air, certain chemicals, trace substances, cadmium, asbestos, diet, alcohol, radiation, etc. as environmental agents.                                                                                                                     | Broad                 | ---                                                                                                                                                                             |
| Nordisk Medicin (39)                                                               | 1977 | Includes cultural/ personal environments.                                                                                                                                                                                                                                                        | Broad                 | “Exogenous, environmental stimuli are responsible directly or indirectly for 30-50 per cent of cancers in males in industrialized societies in Europe, North America and Asia.” |
| Dr. Mostafa Kamal Tolba (40)<br><i>United Nations Environment Programme (UNEP)</i> | 1978 | “Factors in air, water, solar radiation, living and working environments, and personal choices of diet and ways of life – such as tobacco smoking and alcohol consumption.”                                                                                                                      | Broad                 | 60-90% of all cancers are directly or indirectly related to the environment                                                                                                     |
| Robert Hoover (41)                                                                 | 1978 | Anything other than a person’s genetic makeup. This includes exposure to occupational factors, toxic chemicals in the general environment, natural and artificial constituents in the diet, drugs and cigarette smoking and to other exposures related to human habits.                          | Broad                 | The majority of human cancers are environmentally caused                                                                                                                        |
| Tomatis et al. (42)                                                                | 1978 | Chemicals, lifestyle exposures including smoking, alcohol drinking, or certain dietary habits.                                                                                                                                                                                                   | Broad                 | 70-90% of human cancers are environmentally caused                                                                                                                              |
| Vincent F. Garry (43)                                                              | 1978 | Describes carcinogens as environmental chemicals.                                                                                                                                                                                                                                                | Narrow                | Estimates that 60% of all human cancers are due to environmental agents.                                                                                                        |
| Dr. Peter Brookes (44)                                                             | 1978 | “Everything to which man is exposed arising outside the body, i.e. via the air he breathes, the food and drink he consumes as well as any specific exposure he might have due to the nature of his occupation or personal habits.”                                                               | Broad                 | ---                                                                                                                                                                             |
| Schneiderman MA (45)                                                               | 1978 | <i>Personal environment</i> : cigarette smoking, alcohol, sexual habits, and diet.<br><i>Impersonal environment</i> : industrial and occupational pollutants, water and air contaminants, pesticides, flame-retardants, diet additives, and drugs.                                               | Broad                 | 80% of all cancers attributable to the environment                                                                                                                              |
| Patricia A. Buffler (46)                                                           | 1978 | “Everything in the environment – water, diet, personal habits such as drinking and smoking, urban residence, physical, geological features, use of prescription or non-prescription drugs, as well as unique occupational exposures... the combination of all factors in the human environment.” | Broad                 | “It is widely quoted that 75-80 percent, perhaps as high as 90 percent of all cancer is ‘caused by’, ‘due to’ or ‘associated with’ environmental factors.”                      |
| Merril Eisenbud (47)                                                               | 1978 | “Using the term ‘environment’ in its broadest sense – which includes substances naturally present in foods, sunlight, cigarette smoking, excessive use of alcoholic beverages, and chemicals or radiations to which individuals are exposed in the course of their occupations.”                 | Broad                 | 60-90% of all deaths from cancer can be attributed to environmental factors. <sup>a</sup>                                                                                       |
| Joseph C. Arcos (48)                                                               | 1978 | Chemicals in the air, water, food, medications, and work.                                                                                                                                                                                                                                        | Narrow                | 80-90% of all human malignancies can be traced to the effects of environmental agents.                                                                                          |

| Reference                                                            | Year | Definition of environment                                                                                                                                                                                                                                                                                                                                                                                                                                                                                                                                                         | Narrow/<br>broad def. | Environmentally attributable<br>risk estimate for cancer                                                                                                      |
|----------------------------------------------------------------------|------|-----------------------------------------------------------------------------------------------------------------------------------------------------------------------------------------------------------------------------------------------------------------------------------------------------------------------------------------------------------------------------------------------------------------------------------------------------------------------------------------------------------------------------------------------------------------------------------|-----------------------|---------------------------------------------------------------------------------------------------------------------------------------------------------------|
| Gertrude Barna-Lloyd (49)                                            | 1978 | Argues that the environment should not be used just to refer to the pollutants found in air, water, and food, but should also include all extrinsic or exogenous factors such as lifestyle factors – sunshine, diet, and smoking.                                                                                                                                                                                                                                                                                                                                                 | Broad                 | ---                                                                                                                                                           |
| Barbara J. Culliton (50)                                             | 1978 | Environmental chemicals, smoking, dietary factors, alcohol consumption, radiation – not strictly industry.                                                                                                                                                                                                                                                                                                                                                                                                                                                                        | Broad                 | 60-90% of cancers are environmentally caused                                                                                                                  |
| M.R.V. Sahyun (51)                                                   | 1978 | Substances introduced by human activity.                                                                                                                                                                                                                                                                                                                                                                                                                                                                                                                                          | Narrow                | 13-21% of cancers due to substances introduced into the environment by human activity.                                                                        |
| Trosko & Chang (52)                                                  | 1978 | <i>Environmental factors</i> : Kinds and amounts of physical, chemical and biological initiators, physical and chemical promoters, repair inhibitors, gene derepressors, cell division stimulators and immunological suppressors.                                                                                                                                                                                                                                                                                                                                                 | Broad                 | ---                                                                                                                                                           |
| H.F. Thomas (53)                                                     | 1978 | <i>Environmental pollutants</i> : air, water, solid wastes and food contaminants; occupational environment; <i>cultural environment</i> : smoking, alcohol, and diet.                                                                                                                                                                                                                                                                                                                                                                                                             | Broad                 | ---                                                                                                                                                           |
| Clark W. Heath (54)                                                  | 1978 | Chemical pollutants in air and water, radiation, diet, and personal habits such as smoking.                                                                                                                                                                                                                                                                                                                                                                                                                                                                                       | Broad                 | 80-90% of cancers are caused by environmental exposures                                                                                                       |
| L. Fishbein (55)                                                     | 1979 | Cultural environment, cigarette smoking, drinking and eating habits, occupational environment, iatrogenic factors.                                                                                                                                                                                                                                                                                                                                                                                                                                                                | Broad                 | 60-90% of all human cancers have their etiology in environmental factors                                                                                      |
| Robert M. Albrecht (56)<br><i>Food and Drug Administration (FDA)</i> | 1979 | "I think of environmental agents according to whether individuals can protect themselves or whether government must intervene...an environmental agent is a toxic substance which is imposed on the public, often willy-nilly, and often without the public's knowledge that it is being exposed to a hazardous substance....to maintain the distinction between adverse effects which can be prevented by government, and those against which responsible persons can protect themselves <i>if they so choose.</i> "                                                             | Narrow                | ---                                                                                                                                                           |
| W.K. Morgan (57)                                                     | 1979 | Chemicals, cigarette smoking, exposure to ionising radiation, sunlight, and family size.                                                                                                                                                                                                                                                                                                                                                                                                                                                                                          | Broad                 | 80% of cancer can be attributed to environmental factors                                                                                                      |
| John Higginson (58)<br><i>IARC</i>                                   | 1979 | <i>Total environment</i> , cultural as well as chemical. By cultural, I meant mode of life... looking at diets, how they lived, the number of children they had, the age of menopause, the age of menarche – environment is what surrounds people and impinges on them. The air you breathe, the culture you live in, the agricultural habits of your community, the social cultural habits, the social pressures, the physical chemicals with which you come in contact, the diet, and so on...confusion because people have used the word environment purely to mean chemicals. | Broad                 | >90% attributable to environmental factors<br>Men: 63% lifestyle (20% cultural patterns & 43% diet)<br>Women: 30% lifestyle (5% cultural patterns & 25% diet) |
| G. Cavallo (59)                                                      | 1979 | Man's external environment, then, is like the larger box that holds the body, which, in its turn, houses the tumour.                                                                                                                                                                                                                                                                                                                                                                                                                                                              | Broad                 | ---                                                                                                                                                           |
| G. Gori (60)                                                         | 1979 | Diet, tobacco, radiation (UV & X-ray), occupation, alcohol, and exogenous hormones                                                                                                                                                                                                                                                                                                                                                                                                                                                                                                | Broad                 | 80-90% of cancer rates in the US can be attributed to environmental factors                                                                                   |

| Reference                | Year | Definition of environment                                                                                                                                                                                                                                                                       | Narrow/<br>broad def. | Environmentally attributable<br>risk estimate for cancer                                                                                                 |
|--------------------------|------|-------------------------------------------------------------------------------------------------------------------------------------------------------------------------------------------------------------------------------------------------------------------------------------------------|-----------------------|----------------------------------------------------------------------------------------------------------------------------------------------------------|
| Higginson & Muir (61)    | 1979 | Cultural habits, diet, exposure to various infectious agents, average age of menarche, number of children a woman bears, age of menopause - cultural as well as the chemical environment.                                                                                                       | Broad                 | 90% of cancers are attributable to environmental factors.                                                                                                |
| Robert Hoover (62)       | 1979 | Environmental agents include exposure to toxic chemicals on the job and in the general environment, exposure to ionizing and other forms of radiation, ingesting natural and artificial constituents of the diet, ingesting of therapeutic drugs, and exposures related to personal habits.     | Broad                 | 60-90% of cancers are environmental in origin                                                                                                            |
| John Higginson (63)      | 1979 | The total milieu in which people live, including cultural habits, diet, exposure to various infectious agents, average age of menarche, number of children a woman bears, age of menopause - cultural as well as the chemical environment.                                                      | Broad                 | 90% of cancers are due to the environment                                                                                                                |
| NCI (64)                 | 1979 | Not only the quality of the air in the workplace but also such things as dietary habits, smoking, drinking, etc.                                                                                                                                                                                | Broad                 | 60-90% of cancers are environmentally caused                                                                                                             |
| WC Morgan (65)           | 1979 | Cigarette smoking, exposure to ionising radiation, sunlight, family size, as well as chemicals.                                                                                                                                                                                                 | Broad                 | Around 80% of human cancer can be attributed to environmental factors                                                                                    |
| Cimino & Demopoulos (66) | 1980 | Quotes Higginson's definition "'total environment, cultural as well as chemical.'"                                                                                                                                                                                                              | Broad                 | Around 85% of cancers are due to environmental factors                                                                                                   |
| Thomas J. Slaga (67)     | 1980 | Chemicals in the air, water, and food, sunlight, occupational exposures, smoking, alcohol, diet, direct and indirect food additives, prescription drugs, radiation, social habits.                                                                                                              | Broad                 | ---                                                                                                                                                      |
| John Higginson (68)      | 1980 | Includes tobacco, alcohol, sunlight, occupation, radiation, iatrogenic causes, and lifestyle.                                                                                                                                                                                                   | Broad                 | Between 83-87% of cancer deaths in Birmingham (UK) residents are due to environmental factors                                                            |
| Harris et al. (69)       | 1980 | Chemicals, radiation, diet, smoking, viruses.                                                                                                                                                                                                                                                   | Broad                 | 80-90% of cancers are due to the environment                                                                                                             |
| E.M. Whelan (70)         | 1980 | Used broadly, includes all extrinsic stimuli. These include not only commonly recognized environmental pollutants or industrial chemicals but lifestyle habits such smoking, drinking, dietary practices, sunbathing and the like.                                                              | Broad                 | 80-90% of cancers caused by environmental factors                                                                                                        |
| John Higginson (71)      | 1980 | The term 'environment' is used to include not only defined chemical or physical carcinogenic stimuli, including chemical mixtures, e.g. cigarette smoking, but all exogenous influences or patterns of life style (dietary, cultural or behavioural) that are associated with cancer incidence. | Broad                 | 80% of cancers are environmental in origin                                                                                                               |
| E.L. Wynder (72)         | 1980 | Environmental factors include diet, tobacco, radiation (UV & X-ray), drugs, occupation, alcohol, and exogenous hormones.                                                                                                                                                                        | Broad                 | ---                                                                                                                                                      |
| John Higginson (73)      | 1980 | Total cultural, behavioral, and dietary.                                                                                                                                                                                                                                                        | Broad                 | ---                                                                                                                                                      |
| Doll & Peto (74)         | 1981 | Air, water, soil and food pollutants.                                                                                                                                                                                                                                                           | Narrow                | 2% (1-5) of cancer deaths due to pollution <sup>a</sup> ;<br>3% due to pollution, food additives, and industrial products; 4% due to occupational causes |

| Reference                                     | Year | Definition of environment                                                                                                                                                                                                                                                                                                                                            | Narrow/<br>broad def. | Environmentally attributable<br>risk estimate for cancer                         |
|-----------------------------------------------|------|----------------------------------------------------------------------------------------------------------------------------------------------------------------------------------------------------------------------------------------------------------------------------------------------------------------------------------------------------------------------|-----------------------|----------------------------------------------------------------------------------|
| Sir Geoffrey Badger (75)                      | 1981 | Describes environmental factors as naturally occurring carcinogens, tobacco smoking, alcohol, diet, chemical carcinogens produced by man, ultraviolet radiation, and ionizing radiation.                                                                                                                                                                             | Broad                 | About 75% of all human cancers are caused by environmental factors               |
| M. Bundy (76)                                 | 1981 | Lifestyle, cultural patterns, diet, tobacco/alcohol, sunlight, occupation, radiation.                                                                                                                                                                                                                                                                                | Broad                 | 80-90% of all cancer is of environmental origin.                                 |
| J. Higginson (77)                             | 1981 | All exogenous factors which impinge on man, i.e. the dietary, social and cultural environment as well as discrete chemical carcinogens.                                                                                                                                                                                                                              | Broad                 | ---                                                                              |
| US Congress (78)                              | 1981 | Encompasses anything that interacts with humans, including substances eaten, drunk, and smoke, natural and medical radiation, workplace exposures, drugs, aspects of sexual behavior, and substances present in the air, water, and soil. Unfortunately, the statements were sometimes repeated with 'environment' used to mean only air, water, and soil pollution. | Broad                 | 60 to 90% of cancer is associated with the environment                           |
| I. Crombie (79)                               | 1981 | Factors such as tobacco smoke, ionizing radiation, asbestos, occupation, chemicals, food, etc.                                                                                                                                                                                                                                                                       | Broad                 | Environmental factors are responsible for up to 90% of human cancer              |
| S. Langard (80)                               | 1981 | Including factors such as smoking, alcohol, and occupational exposures.                                                                                                                                                                                                                                                                                              | Broad                 | 80-90% of all human cancer causes are primarily caused by environmental factors. |
| Donald F. Austin (81)                         | 1981 | Everything that is not genetic.                                                                                                                                                                                                                                                                                                                                      | Broad                 | Between 60-90% of all cancer is environmentally caused                           |
| Greenberg & Meier (82)                        | 1982 | Encompasses all factors other than heredity – diet, personal habits, and reproductive behavior.                                                                                                                                                                                                                                                                      | Broad                 | 80% of cancers are environmentally caused                                        |
| A. Lilienfeld (83)                            | 1982 | <i>Macro-environment</i> : general communal environment to which groups of people are exposed. <i>Micro-environment</i> : individual exposures such as cigarette smoking, dietary habits, medical radiation exposure, etc. Environmental agents can be classified into three categories: radiation, chemical, and biological.                                        | Broad                 | 80-90% of cancers are caused by environmental agents                             |
| R. McKenna (84)                               | 1982 | Diet, life style, synthetic chemical contaminants.                                                                                                                                                                                                                                                                                                                   | Broad                 | 80 to 90% of cancers are environmentally caused                                  |
| Committee on Diet, Nutrition, and Cancer (85) | 1982 | Anything external to humans, i.e., lifestyle factors and anything to which humans are exposed, including all forms of radiation and substances eaten, drunk, and inhaled.                                                                                                                                                                                            | Broad                 | ---                                                                              |
| H.F. Kraybill (86)                            | 1983 | Atmospheric and aquatic pollutants which have additive or promotional effects on other causative agents such as contaminants in food, smoking, alcohol, and workplace exposures.                                                                                                                                                                                     | Narrow                | ---                                                                              |
| Weisburger & Horn (87)                        | 1982 | Not just chemicals – including dietary factors, etc. as well.                                                                                                                                                                                                                                                                                                        | Broad                 | 70-90% of cancers have been associated with environmental causes.                |
| John Higginson (88)                           | 1983 | Lifestyle – including cultural habits, e.g., cigarettes, diet, behavioral and cultural patterns.                                                                                                                                                                                                                                                                     | Broad                 | ---                                                                              |

| Reference                 | Year | Definition of environment                                                                                                                                                                                                                                                                                                                                                                                                                                                                                                                                                                                                                                                                                            | Narrow/<br>broad def. | Environmentally attributable<br>risk estimate for cancer                                                            |
|---------------------------|------|----------------------------------------------------------------------------------------------------------------------------------------------------------------------------------------------------------------------------------------------------------------------------------------------------------------------------------------------------------------------------------------------------------------------------------------------------------------------------------------------------------------------------------------------------------------------------------------------------------------------------------------------------------------------------------------------------------------------|-----------------------|---------------------------------------------------------------------------------------------------------------------|
| Virginia L. Ernster (89)  | 1983 | "I use the term environment in the broadest sense, not confined to ambient or air or occupational exposures but encompassing all aspects of lifestyle – diet, smoking, sexual behavior, drugs, and so on."                                                                                                                                                                                                                                                                                                                                                                                                                                                                                                           | Broad                 | 80-90% of cancers are associated with environmental factors                                                         |
| I. Hirono (90)            | 1983 | Carcinogens closely related to the daily life of humans.                                                                                                                                                                                                                                                                                                                                                                                                                                                                                                                                                                                                                                                             | Broad                 | 80 to 90% of human cancer are caused by environmental carcinogens which are closely related to daily life of humans |
| John Higginson (91)       | 1983 | All exogenous influences which impinged on man, ie, dietary, social, and cultural environments, as well as exposure to synthetic discrete chemical carcinogens.                                                                                                                                                                                                                                                                                                                                                                                                                                                                                                                                                      | Broad                 | 80% of cancers                                                                                                      |
| James D. Hardy (92)       | 1983 | Almost everything that the human being can consciously control or modify by himself or herself.                                                                                                                                                                                                                                                                                                                                                                                                                                                                                                                                                                                                                      | Broad                 | 50-95% of all cancer is caused by the environment                                                                   |
| William J. Nicholson (93) | 1984 | "'Environmental factors' are taken to mean the totality of the effects of that which we eat, breathe, or are otherwise exposed to."                                                                                                                                                                                                                                                                                                                                                                                                                                                                                                                                                                                  | Broad                 | Environmental factors contribute to at least 80% of United States cancer                                            |
| J. Neuberger (94)         | 1984 | Encompasses everything outside of man (i.e., air and water pollution, occupation, diet, smoking, and drinking).                                                                                                                                                                                                                                                                                                                                                                                                                                                                                                                                                                                                      | Broad                 | ---                                                                                                                 |
| C. Ramel (95)             | 1984 | Exogenous and endogenous factors.                                                                                                                                                                                                                                                                                                                                                                                                                                                                                                                                                                                                                                                                                    | Broad                 | The vast majority of cancer (close to 90%) is caused by exogenous and endogenous environmental factors.             |
| Muir & Parkin (96)        | 1985 | Embraces all elements of lifestyle – dietary, social, and cultural habits (in which the specific carcinogenic factors may be ill understood)- as well as exposure to carcinogens at work, radiation, and drugs.                                                                                                                                                                                                                                                                                                                                                                                                                                                                                                      | Broad                 | 80-90% of human cancer is determined environmentally                                                                |
| Alfred G. Knudson (97)    | 1985 | Chemicals, radiation, viruses, cigarette smoking, and dietary factors.                                                                                                                                                                                                                                                                                                                                                                                                                                                                                                                                                                                                                                               | Broad                 | 80% of cancer is environmentally induced                                                                            |
| L. Garfinkel (98)         | 1986 | Includes cigarette smoking, dietary constituents, workplace hazards, reproductive and sexual behavior, certain infections, drugs, ionizing radiation, air and water pollution, and consumer products.                                                                                                                                                                                                                                                                                                                                                                                                                                                                                                                | Broad                 | 50-90% of all cancers are promoted or caused by various personal and environmental factors.                         |
| Charles E. Kupchella (99) | 1986 | "The human environment can be defined in terms of habit or lifestyle as well as in terms of geography." "The environment includes <i>everything</i> from the skin out and everything from the lining of body cavities open to the outside, in. Also, environmental 'factors' are not restricted to direct-acting carcinogens, promoters, immune system suppressors, and other host-modifying agents, as well as carcinogens and chemicals that can be converted into carcinogens in the body." Includes "cancer-associated environmental factors" – tobacco, alcohol, natural radiation, medical drugs and radiation, occupational exposures, diet, sexual development, pollution, consumer products, and infection. | Broad                 | 90% of all human cancer is caused by factors in the environment                                                     |
| D. Schottenfeld (100)     | 1986 | Tobacco, alcohol, ionizing radiation, solar radiation, medications, estrogens, viruses and parasites, dietary deficiencies and excesses, and pollution.                                                                                                                                                                                                                                                                                                                                                                                                                                                                                                                                                              | Broad                 | Most human cancers are triggered or propagated by exposure to environmental agents.                                 |



| Reference                  | Year | Definition of environment                                                                                                                                                                                                                                                                                       | Narrow/<br>broad def. | Environmentally attributable<br>risk estimate for cancer                                               |
|----------------------------|------|-----------------------------------------------------------------------------------------------------------------------------------------------------------------------------------------------------------------------------------------------------------------------------------------------------------------|-----------------------|--------------------------------------------------------------------------------------------------------|
| O'Neill & Fishbein (101)   | 1986 | Factors such as tobacco, alcohol, asbestos, diet, and occupation.                                                                                                                                                                                                                                               | Broad                 | 85% of cancers might arise from environmental causes                                                   |
| John Higginson (102)       | 1987 | Any agent, chemical, virus, or life-style risk factor that is associated with an increase in cancer in animals or humans.                                                                                                                                                                                       | Broad                 | ---                                                                                                    |
| Mulvihill & Tulinius (103) | 1987 | Including behavioral factors.                                                                                                                                                                                                                                                                                   | Broad                 | 80-90% of cancers due to environmental factors                                                         |
| B. Weinstein (104)         | 1988 | External agents such as chemicals, radiation, and viruses. Lists exogenous as environmental and exogenous as genetic or hormonal.                                                                                                                                                                               | Broad                 | ---                                                                                                    |
| T. Sugimura (105)          | 1988 | Diet, smoking, occupation, ionizing radiation, viruses, etc.                                                                                                                                                                                                                                                    | Broad                 | ---                                                                                                    |
| John Higginson (106)       | 1988 | All conditions that impinge on human cancer (e.g., poverty, life style, diet, viruses).                                                                                                                                                                                                                         | Broad                 | ---                                                                                                    |
| Marie Swanson (107)        | 1988 | For the purpose of their discussion <i>environmental</i> refers to "specific sources of carcinogens: outdoor and indoor air contamination, drinking water and natural waterway contamination, and contamination resulting from hazardous waste disposal."                                                       | Narrow                | ---                                                                                                    |
| L. Tomatis (108)           | 1988 | Chemicals, viruses and infectious agents, radiation, diet, culturally determined habits, and socio-economic conditions.                                                                                                                                                                                         | Broad                 | ---                                                                                                    |
| Michael Gough (109)        | 1989 | <i>Broad</i> : "Everything that humans encounter: everything that is eaten, drunk, and smoked; drugs, medicines, and occupational exposures; and air, water, and soil... everything outside the body as distinct from a person's genetics."<br><i>Narrow</i> : more commonly used to mean air, water, and soil. | Narrow                | <i>Broad</i> : 80-90%<br><i>Narrow</i> : 1-3%                                                          |
| Perera et al. (110)        | 1989 | Occupational exposures, air pollutants, drinking water, pesticides, toxic chemicals, additives in the diet, natural constituents in the diet, and lifestyle choices (including smoking and diet).                                                                                                               | Broad                 | The vast majority of cancer can be attributed to a broad category of environmental factors             |
| Krishna Murti (111)        | 1989 | Contamination by chemicals or radiation.                                                                                                                                                                                                                                                                        | Narrow                | 60% of cancer is attributable to environmental causes                                                  |
| J. Neuberger (112)         | 1990 | Including individual lifestyle or personal factors.                                                                                                                                                                                                                                                             | Broad                 | About 80% of cancers are attributable to the environment                                               |
| Tran Ba Loc P. (113)       | 1990 | Physical, chemical, and biological factors.                                                                                                                                                                                                                                                                     | Broad                 | State that 50-60% of cancer cases are believed to be caused by the environment                         |
| Shields & Harris (114)     | 1990 | Chemicals, radiation, and biological agents.                                                                                                                                                                                                                                                                    | Broad                 | ---                                                                                                    |
| Chu & Chu (115)            | 1990 | Diet, environmental pollutants, occupation, and life-style factors such as smoking.                                                                                                                                                                                                                             | Broad                 | ---                                                                                                    |
| Augustin et al. (116)      | 1991 | <i>Environmental pollutants</i> – carcinogenic elements in water, air and aerosols.                                                                                                                                                                                                                             | Narrow                | Environmental factors & life-style contribute to 70-90% of cancer cases; Environmental pollution: 1-3% |

| Reference              | Year | Definition of environment                                                                                                                                                                                                                                                                                                                                                                                                                                                                                                                                                                           | Narrow/<br>broad def. | Environmentally attributable<br>risk estimate for cancer                                                                                                      |
|------------------------|------|-----------------------------------------------------------------------------------------------------------------------------------------------------------------------------------------------------------------------------------------------------------------------------------------------------------------------------------------------------------------------------------------------------------------------------------------------------------------------------------------------------------------------------------------------------------------------------------------------------|-----------------------|---------------------------------------------------------------------------------------------------------------------------------------------------------------|
| A. Knudson (117)       | 1992 | Viruses, smoking, and dietary factors.                                                                                                                                                                                                                                                                                                                                                                                                                                                                                                                                                              | Broad                 | 80% of common cancers of adults are largely induced by environmental agents                                                                                   |
| Richard Doll (118)     | 1992 | The conditions under which any person lives. "We can, however, limit the conditions to those whose effects people are individually unable to control, and so exclude such conditions as the availability of tobacco and, in high-income societies, of a high-fat diet, as people exposed to them can choose alternative diets and whether or not to smoke."                                                                                                                                                                                                                                         | Narrow                | ---                                                                                                                                                           |
| M. Kreuter (119)       | 1992 | <i>Environmental factors</i> : not only the physical aspects of the environment implied in the traditional public-health sense, such as air and water quality and carcinogenic agents in the environment, but also social and economic factors, such as educational level, participation in health insurance plans and access to health services.                                                                                                                                                                                                                                                   | Broad                 | ---                                                                                                                                                           |
| Higginson et al. (120) | 1992 | All exogenous factors that impinge on human health, whether they be physical, biological, cultural or chemical.                                                                                                                                                                                                                                                                                                                                                                                                                                                                                     | Broad                 | There is an exogenous component in about 70-80% of cancers.                                                                                                   |
| S.C. McMillan (121)    | 1992 | Chemicals, tobacco, alcohol, dietary fat, radiation, and viruses.                                                                                                                                                                                                                                                                                                                                                                                                                                                                                                                                   | Broad                 | Between 40-90% of cancers caused by environmental agents can be prevented.                                                                                    |
| H. Moller (122)        | 1993 | Environmental pollutants and factors relating to living conditions and lifestyle.                                                                                                                                                                                                                                                                                                                                                                                                                                                                                                                   | Broad                 | At least 50% of the cancer incidence in Denmark may be attributable to environmental factors <sup>c</sup>                                                     |
| John Higginson (123)   | 1993 | All conditions that impinge on human cancer (e.g., poverty, life style, diet, viruses).                                                                                                                                                                                                                                                                                                                                                                                                                                                                                                             | Broad                 | 80% of all cancers have an environmental component.                                                                                                           |
| S.S. Epstein (124)     | 1993 | Diet, tobacco, reproductive/sexual behavior, occupation, alcohol, geophysical factors, pollution, industrial products, and medicine and medical procedures.                                                                                                                                                                                                                                                                                                                                                                                                                                         | Broad                 | Environmental factors contribute to 86% of cancer mortality. <sup>a</sup>                                                                                     |
| Cohen et al. (125)     | 1994 | "Using the term, environment, to include specific external entities and such nonspecific things as lifestyle, emotions, and psychosocial experiences, one might say that all human pathology is associated with an external factor... it should be noted that when we speak of the environment, we include a broad range of human experience, including lifestyle as well as exposure to specific agents." Environmental causes of cancer: tobacco, alcohol, diet, occupation, viruses, bacteria, parasites, ultraviolet light, ionizing radiation, hormones, medications, pollution and lifestyle. | Broad                 | ---                                                                                                                                                           |
| Hazel Inskip (126)     | 1994 | Including geophysical (naturally occurring) factors and pollution.                                                                                                                                                                                                                                                                                                                                                                                                                                                                                                                                  | Narrow                | 5% of all cancers due to the environment<br>3% (2-4%) due to naturally occurring factors<br>2% (<1-5%) due to pollution                                       |
| S. Venitt (127)        | 1994 | Describes environmental carcinogens as chemicals, radiation, or combinations of these.                                                                                                                                                                                                                                                                                                                                                                                                                                                                                                              | Narrow                | "It is therefore impossible, at present, to determine the precise contribution that individual susceptibility makes to risk of cancer in a given population." |
| Davis & Muir (128)     | 1995 | Environmental factors broadly defined – tobacco, diet, infectious agents, radiation, occupational exposures, and environmental contaminants.                                                                                                                                                                                                                                                                                                                                                                                                                                                        | Broad                 | 75-80% of all cancers attributable to the environment                                                                                                         |

| Reference                                  | Year | Definition of environment                                                                                                                                                                                                                                                                                                                                                                                                            | Narrow/<br>broad def. | Environmentally attributable<br>risk estimate for cancer                                                                                           |
|--------------------------------------------|------|--------------------------------------------------------------------------------------------------------------------------------------------------------------------------------------------------------------------------------------------------------------------------------------------------------------------------------------------------------------------------------------------------------------------------------------|-----------------------|----------------------------------------------------------------------------------------------------------------------------------------------------|
| Health Canada (129)                        | 1995 | Pollution, UV radiation, and occupational exposures.                                                                                                                                                                                                                                                                                                                                                                                 | Narrow                | 10-15% of all cancers linked to the environment                                                                                                    |
| Carl G. Kardinal (130)                     | 1995 | “Defined in the broadest sense, environment includes the total exposure of the individual to the external world, and includes those lifestyle and cultural factors such as diet, cigarette smoking, industrial chemicals, pollution, infectious agents, and ionizing radiation.”                                                                                                                                                     | Broad                 | As many as 90% of human cancers are caused by environmental factors                                                                                |
| A. Olshan (131)                            | 1995 | <i>Environmental exposure</i> : includes all exogenous sources, including the <i>general environment</i> (air and water pollution), occupational setting, lifestyle (smoking, alcohol, drugs), and medical treatment.                                                                                                                                                                                                                | Broad                 | ---                                                                                                                                                |
| Vainio & Husgafvel-Pursiainen (132)        | 1996 | All exogenous factors – exposures from smoking, diet, and work; internal dose: metabolite level in body fluids; biologically effective dose; early biological responses. <i>Endogenous</i> : host-related, such as genetic, hormonal or immunological factors.                                                                                                                                                                       | Broad                 | ---                                                                                                                                                |
| Sir Richard Doll (133)                     | 1996 | Tobacco smoke, alcohol, infection, diet, physical activity, occupational exposures, and pollution.                                                                                                                                                                                                                                                                                                                                   | Broad                 | Age-specific incidence rates could be reduced by 80-90%                                                                                            |
| J.S. Malpas (134)                          | 1996 | Chemicals, drugs, tobacco, alcohol, viruses, and dietary factors.                                                                                                                                                                                                                                                                                                                                                                    | Broad                 | ---                                                                                                                                                |
| National Institutes of Health (135)        | 1996 | Food and nutrients, synthetic and naturally-occurring chemicals, and physical agents such as heat and ionizing radiation... the scope of what comprises the environment has been extended beyond the historical preoccupation with industrial products and byproducts.                                                                                                                                                               | Broad                 | Nearly all diseases are thought to arise from the interplay between inherited genetic alterations and the environment                              |
| Bartsch & Hietanen (136)                   | 1996 | Chemical exposures.                                                                                                                                                                                                                                                                                                                                                                                                                  | Narrow                | 80-90% of all cancers are related to environmental factors, tobacco smoke, and diet.                                                               |
| Harvard Center for Cancer Prevention (137) | 1996 | Air, water and soil pollutants.                                                                                                                                                                                                                                                                                                                                                                                                      | Narrow                | 2% cancer incidence due to environmental pollution<br>2% due to ionizing radiation<br>5% due to occupational exposures<br>1% due to food additives |
| Trichopoulos et al. (138)                  | 1996 | Noninherited – including lifestyle factors. Tobacco smoke, diet, alcohol, radiation, occupational exposures, viruses, and pollutants in the air, water, and soil.                                                                                                                                                                                                                                                                    | Broad                 | About 75-80% of cancer deaths can be attributed to environmental factors. <sup>a</sup>                                                             |
| F. Karaer (139)                            | 1996 | <i>Environmental pollution</i> : All the waste and toxic chemicals released into the ecosphere by man – liquid, gaseous, and solid waste.                                                                                                                                                                                                                                                                                            | Narrow                | Environmental carcinogens account for 75% of all cancer cases.                                                                                     |
| Woodward & Boffetta (140)                  | 1997 | “The concept of environment is often used in a broad sense, to comprise all factors unrelated to the genetic make-up of an individual, such as occupation, nutrition, lifestyle and reproductive habits, infections and so on...Most commonly, however, the concept of the environment is used in a narrower sense, to cover only factors related to the place where people live, and over which each individual has little control. | Narrow                | ---                                                                                                                                                |

| Reference                  | Year | Definition of environment                                                                                                                                                                                                                                                                                                                                                                                                                                                                                                                             | Narrow/<br>broad def. | Environmentally attributable<br>risk estimate for cancer                                                  |
|----------------------------|------|-------------------------------------------------------------------------------------------------------------------------------------------------------------------------------------------------------------------------------------------------------------------------------------------------------------------------------------------------------------------------------------------------------------------------------------------------------------------------------------------------------------------------------------------------------|-----------------------|-----------------------------------------------------------------------------------------------------------|
| Ahlbom et al. (141)        | 1997 | Includes lifestyle factors as environmental.                                                                                                                                                                                                                                                                                                                                                                                                                                                                                                          | Broad                 | Genetic effects can explain more than 10% of the studied cancers.                                         |
| Thomas & Hrudey (142)      | 1997 | Pollution, UV radiation, occupational exposures, and consumer products.                                                                                                                                                                                                                                                                                                                                                                                                                                                                               | Narrow                | 2-10% of cancer deaths                                                                                    |
| John Higginson (143)       | 1997 | Any influence which impinged on humans should be considered, whether cultural, biological, nutritional, or physical.                                                                                                                                                                                                                                                                                                                                                                                                                                  | Broad                 | 70-80% of cancers have an environmental component.                                                        |
| F.P. Perera (144)          | 1997 | Tobacco smoke, dietary constituents, pollutants (in the workplace, air, water, and food supply), drugs, radiation, and infectious agents.                                                                                                                                                                                                                                                                                                                                                                                                             | Broad                 | Environmental factors explain about 95% of all cancer                                                     |
| WHO (145)                  | 1997 | Occupational exposures, viruses and other infectious agents, air pollution, chemical exposures, food additives, radon gas, other types of radiation and solar UVR. Does not include tobacco smoking, diet, or alcohol consumption.                                                                                                                                                                                                                                                                                                                    | Broad                 | 25% of cancer DALYs attributed to the environment <sup>b</sup>                                            |
| Sir Richard Doll (146)     | 1998 | Air, water and food pollutants.                                                                                                                                                                                                                                                                                                                                                                                                                                                                                                                       | Narrow                | 1-5%                                                                                                      |
| John Higginson (147)       | 1998 | Any factor whether cultural, dietary, biological, etc., which influenced human cancer incidence should be considered as part of the environment and not only chemicals.                                                                                                                                                                                                                                                                                                                                                                               | Broad                 | 70-80% of all human cancers have an environmental component.                                              |
| F.P. Perera (148)          | 1998 | Smoking, diet, workplace and ambient pollutants.                                                                                                                                                                                                                                                                                                                                                                                                                                                                                                      | Broad                 | 80% of cancer is related to environmental factors                                                         |
| Ames & Gold (149)          | 1998 | Air, water and soil pollutants.                                                                                                                                                                                                                                                                                                                                                                                                                                                                                                                       | Narrow                | <1% due to environmental pollutants                                                                       |
| Armstrong & Boffetta (150) | 1998 | Non-genetic factors, including human behavior, habits, lifestyle and external factors over which the individual has no control.                                                                                                                                                                                                                                                                                                                                                                                                                       | Broad                 | 80-90% of all human cancers are environmentally determined                                                |
| Smith et al. (151)         | 1999 | Measurable stressors that penetrate from the outer environment across the body barriers to affect bodily health. Includes occupational exposures, food preservatives and chemicals. Nutrition, active smoking and alcohol not included.                                                                                                                                                                                                                                                                                                               | Broad                 | 20-25% of all cancers attributable to the environment                                                     |
| Minamoto et al. (152)      | 1999 | Chemical carcinogens, such as those found in cigarette smoke, dietary contaminants, such as the mycotoxin aflatoxin B1, and physical carcinogens, such as UV irradiation, asbestos and radon. Other environmental factors include pathogenic bacteria and viruses, such as <i>Helicobacter pylori</i> , human papilloma virus (HPV), and human hepatitis B and C virus (HBV/HCV). Life-styles that ignore known risk factors, such as smoking, excess exposure to sunlight, fat consumption and stress are themselves integral environmental factors. | Broad                 | ---                                                                                                       |
| S. Tominaga (153)          | 1999 | Includes tobacco, diet, infection, parasites, bacteria, reproductive factors, occupation, alcohol, sunlight/radiation, pollution, medical procedures, sexual behavior, industrial products, food additives, obesity, exercise and stress as environmental factors.                                                                                                                                                                                                                                                                                    | Broad                 | 70-90% of cancer in Japan can be attributed to environmental risk factors <sup>c</sup>                    |
| Verkasalo et al. (154)     | 1999 | Non-genetic effects, thus denoting both physical environment and life-style, regardless of whether they aggregate in families.                                                                                                                                                                                                                                                                                                                                                                                                                        | Broad                 | Unique environmental factors accounted for 75% (65-85%) of the inter-individual variation in cancer risk. |

| Reference                                 | Year | Definition of environment                                                                                                                                                                                                                                                                          | Narrow/<br>broad def. | Environmentally attributable<br>risk estimate for cancer                                                                                                                                                                       |
|-------------------------------------------|------|----------------------------------------------------------------------------------------------------------------------------------------------------------------------------------------------------------------------------------------------------------------------------------------------------|-----------------------|--------------------------------------------------------------------------------------------------------------------------------------------------------------------------------------------------------------------------------|
| Lichter & Rothman (155)                   | 1999 | A wide array of causes, including natural as well as man-made agents. Anything that interacts with humans, including substances eaten, drunk, and smoked, natural and medical radiation, workplace exposures drugs, aspects of sexual behavior, and substances present in the air, water and soil. | Broad                 | 90% of all cancers are caused by contaminants placed in the environment by man.                                                                                                                                                |
| Lichtenstein et al. (156)                 | 2000 | Non-genetic factors                                                                                                                                                                                                                                                                                | Broad                 | Contribution of environmental factors ranged from 58-82%                                                                                                                                                                       |
| J. Carl Barrett (157)                     | 2000 | Describes <i>environmental factors</i> as natural and synthetic chemicals, radiation, viruses, diet, and ill-informed lifestyle factors.                                                                                                                                                           | Broad                 | ---                                                                                                                                                                                                                            |
| F.P. Perera (158)                         | 2000 | Exposures related to lifestyle and occupation and pollutants in air, water, and the food supply.                                                                                                                                                                                                   | Broad                 | "The great majority of cancers are, in principle, preventable because the factors that determine their incidence are largely exogenous or environmental."                                                                      |
| American Cancer Society (ACS) (159)       | 2000 | Environmental factors include smoking, diet, and infectious diseases as well as chemicals and radiation in our homes and workplaces.                                                                                                                                                               | Broad                 | Estimates that environmental factors cause 75% of all cancer cases in the US <sup>c</sup>                                                                                                                                      |
| Perera & Weinstein (160)                  | 2000 | Cigarette smoking, occupational and environmental chemicals, radiation, dietary factors and viruses.                                                                                                                                                                                               | Broad                 | ---                                                                                                                                                                                                                            |
| S.S. Epstein (161)                        | 2001 | "There are chemicals in the environment, there is air pollution, and there are also consumer products with undisclosed cancer risks – pharmaceutical and body-care products, household products, and food contaminated with pesticides; there is also indoor pollution and occupational exposure." | Narrow                | ---                                                                                                                                                                                                                            |
| R.B. Hayes (162)                          | 2001 | Non-genetic factors.                                                                                                                                                                                                                                                                               | Broad                 | 85% of cancer can be attributed to environmental causes                                                                                                                                                                        |
| Adami et al. (163)                        | 2001 | Air, water and soil pollutants                                                                                                                                                                                                                                                                     | Narrow                | 2% mortality due to environmental pollution <sup>a</sup><br><5% due to occupational factors<br>2% due to Ionizing & UV radiation<br>1% due to food additives                                                                   |
| Tomatis et al. (164)                      | 2001 | Synthetic and natural chemicals.                                                                                                                                                                                                                                                                   | Narrow                | "Cancer is thought to be a consequence of genetic and environmental factors, and there are no accurate estimates of the percentage of cancers directly attributable to exposure to occupational or environmental carcinogens." |
| Dreyer et al. (165)                       | 2001 | Tobacco, alcohol, occupation, radon, radiation, infections.                                                                                                                                                                                                                                        | Broad                 | 23% (women) and 42% (men) cancer deaths attributable to the environment <sup>c</sup>                                                                                                                                           |
| Melse & de Hollander (166)<br><i>OECD</i> | 2001 | Include physical, chemical and biological human-made or influenced exposures, but exclude occupational health and safety, traffic, war, and life-style factors.                                                                                                                                    | Broad                 | 1-5%                                                                                                                                                                                                                           |

| Reference                   | Year | Definition of environment                                                                                                                                                                                                                                                                                                                                                                                                 | Narrow/<br>broad def. | Environmentally attributable<br>risk estimate for cancer                                                                                                                                                       |
|-----------------------------|------|---------------------------------------------------------------------------------------------------------------------------------------------------------------------------------------------------------------------------------------------------------------------------------------------------------------------------------------------------------------------------------------------------------------------------|-----------------------|----------------------------------------------------------------------------------------------------------------------------------------------------------------------------------------------------------------|
| Wang & Chen (167)           | 2001 | External factors                                                                                                                                                                                                                                                                                                                                                                                                          | Broad                 | Genetic factors are thought to explain only about 5% of all cancer – the remainder can be attributed to external, ‘environment’ factors that act in conjunction with both genetic and acquired susceptibility. |
| Hemminki et al. (168)       | 2001 | Includes smoking, diet, and lifestyle factors.                                                                                                                                                                                                                                                                                                                                                                            | Broad                 | Environmental effect: 67-68% for colorectal cancer and melanoma<br>71% for lung cancer                                                                                                                         |
| Montesano & Hall (169)      | 2001 | “We use the term ‘environmental causes’ with reference to different types of human exposures that include exogenous risk factors (chemical, physical and biological agents) and endogenous risk factors (e.g. oxidative DNA damage resulting from infections, gastric reflux in adenocarcinoma of the oesophagus, etc.).”                                                                                                 | Broad                 | ---                                                                                                                                                                                                            |
| Landrigan et al. (170)      | 2002 | Toxic chemicals of human origin in air, food, water and communities. Excludes outcomes of personal choice such as tobacco, alcohol, or drug use.                                                                                                                                                                                                                                                                          | Narrow                | At least 5%-10% and less than 80%-90% <sup>d</sup> of all childhood cancers attributed to the environment (5-90%)                                                                                              |
| W. Willett (171)            | 2002 | The broadest sense (non-genetic factors).                                                                                                                                                                                                                                                                                                                                                                                 | Broad                 | At least 80 or 90%                                                                                                                                                                                             |
| Davis & Webster (172)       | 2002 | Encompasses the full array of exogenous factors and impacts on natural resources.                                                                                                                                                                                                                                                                                                                                         | Broad                 |                                                                                                                                                                                                                |
| Carpenter et al. (173)      | 2002 | Smoking, diet, pollutants, radiation, infectious agents, and drugs.                                                                                                                                                                                                                                                                                                                                                       | Broad                 | Genetics alone account for no more than 5% of cancers                                                                                                                                                          |
| L. Migliore (174)           | 2002 | Lists examples of environmental factors as tobacco smoke, sunlight exposure, aflatoxin, ionizing radiation, heterocyclic amines, aromatic amines, viral infections, inflammation, asbestos, arsenic, nickel, cadmium, cobalt, and vinyl chloride.                                                                                                                                                                         | Broad                 | ---                                                                                                                                                                                                            |
| Institute of Medicine (175) | 2002 | The sum total of all the conditions and elements that make up the surroundings and influence the development and actions of an individual.                                                                                                                                                                                                                                                                                | Broad                 | 80% of cancers are related to environmental factors                                                                                                                                                            |
| B. Stewart (176)            | 2002 | <i>Environmental factors</i> : include not only a number of specific chemicals encountered in an occupational, medicinal or dietary context, but also complex mixtures encountered in foodstuffs, tobacco smoke, pollutants and workplace conditions. Ionising and non-ionising radiation, certain infections, chronic inflammatory states, some behaviors, reproductive status, and the competence of the immune system. | Broad                 | 60-90% cancer caused by environmental factors                                                                                                                                                                  |
| Czene et al. (177)          | 2002 | Tobacco smoking, infections, ultraviolet and ionizing radiation, alcohol and occupational exposures, and dietary factors.                                                                                                                                                                                                                                                                                                 | Broad                 | 58-88% of cancers were attributed to non-shared environmental factors                                                                                                                                          |
| Linnet et al. (178)         | 2003 | Radiation (including ionizing and non-ionizing forms), metals, fibers (eg, asbestos), individual chemicals, mixtures (eg, paints, cigarette smoke, pharmaceutical agents containing several chemicals), dietary constituents (including mixtures such as food groups, macronutrients such as specific types of fat, and micronutrients) and physical activity.                                                            | Broad                 | ---                                                                                                                                                                                                            |

| Reference                           | Year | Definition of environment                                                                                                                                                                                                                                                                                                                                             | Narrow/<br>broad def. | Environmentally attributable<br>risk estimate for cancer                      |
|-------------------------------------|------|-----------------------------------------------------------------------------------------------------------------------------------------------------------------------------------------------------------------------------------------------------------------------------------------------------------------------------------------------------------------------|-----------------------|-------------------------------------------------------------------------------|
| Vermont Department of Health (179)  | 2003 | Differentiates between lifestyle factors (tobacco use, alcohol, poor diet, and overexposure to sunlight) and environmental pollutants and radiation.                                                                                                                                                                                                                  | Narrow                | 4% of cancer deaths can be attributed to environmental pollution or radiation |
| D. Briggs (180)                     | 2003 | <i>Environmental pollution</i> : the presence in the environment of an agent, which is potentially damaging to either the environment or human health.                                                                                                                                                                                                                | Narrow                | ---                                                                           |
| D. Dix (181)                        | 2003 | Chemical, physical, and biological agents.                                                                                                                                                                                                                                                                                                                            | Broad                 | States that the 80% estimate is exaggerated                                   |
| Kreiger et al. (182)                | 2003 | Defines “ <i>environmental exposures</i> ” as natural and anthropogenic chemical and physical hazards in air, water, soil, foods, consumer products, and our climate to which people may be exposed, usually involuntarily because of the need to eat, drink, and breathe in order to live.                                                                           | Narrow                | ---                                                                           |
| Boffetta & Nyberg (183)             | 2003 | <i>Broad</i> : All non-genetic factors such as diet, lifestyle and infectious agents.<br><i>Narrow</i> : Only the (natural or man-made) agents encountered by humans in their daily life, upon which they have no or limited personal control.<br><br>Most important environmental exposures: outdoor/indoor air pollution and soil and drinking water contamination. | Narrow                | ---                                                                           |
| Lesley Rushton (184)                | 2003 | <i>Broad</i> : External conditions influencing the development of people, animals, or plants; <i>Voluntary</i> : lifestyle factors including smoking, diet and alcohol; <i>Involuntary</i> : Occupation, air and water pollutants.                                                                                                                                    | Broad                 | ---                                                                           |
| Massey & Ackerman (185)             | 2003 | Chemical pollutants in the ambient environment. Excludes tobacco, alcohol, drug use, and any factors related to personal or familial choice.                                                                                                                                                                                                                          | Narrow                | 5-90% <sup>d</sup> - only includes childhood cancers                          |
| World Cancer Report 2003 IARC (186) | 2003 | Differentiates between broad <i>environmental factors</i> – including active smoking, alcohol intake, sun exposure and dietary makeup (where individuals have control over their actions) and <i>environmental pollutants</i> – contaminants in air, water and soil (where individuals lack control over their level of exposure).                                    | Narrow                | 1-4% of cancers attributable to environmental pollutants                      |
| P. Boffetta (187)                   | 2004 | <i>Broad</i> : All nongenetic factors such as diet, lifestyle and infectious agents.<br><i>Narrow</i> : Only the (natural or man-made) agents encountered by humans in their daily life, upon which they have no or limited personal control. Outdoor and indoor air pollution and soil and drinking water contamination.                                             | Narrow                | 0.5-1% of all cancers are environmental in cause                              |
| Wogan et al. (188)                  | 2004 | Diet, smoking, alcohol ingestion, drug administration, ingestion of herbal remedies, exposure to environmental pollutants                                                                                                                                                                                                                                             | Broad                 | ---                                                                           |
| Kolonel et al. (189)                | 2004 | Tobacco use, reproductive and menstrual traits, exogenous hormones, obesity, certain dietary items, sun exposure, viruses, and other chronic infections, and some occupational exposures.                                                                                                                                                                             | Broad                 | ---                                                                           |
| Parkin (190)                        | 2004 | External environment (air pollution, water contaminants, radiation, etc.) and lifestyle (reproduction, diet, tobacco use, etc.).                                                                                                                                                                                                                                      | Broad                 | ---                                                                           |

| Reference                       | Year | Definition of environment                                                                                                                                                                                                                                                                                     | Narrow/<br>broad def. | Environmentally attributable<br>risk estimate for cancer                                                                                                                     |
|---------------------------------|------|---------------------------------------------------------------------------------------------------------------------------------------------------------------------------------------------------------------------------------------------------------------------------------------------------------------|-----------------------|------------------------------------------------------------------------------------------------------------------------------------------------------------------------------|
| Benedetto Terracini (191)       | 2004 | Including cultural and behavioral factors, tobacco, diet, alcohol, and radiation.                                                                                                                                                                                                                             | Broad                 | At least 75% of cancers are attributable to exogenous factors.                                                                                                               |
| Aaron Blair (192)<br><i>NCI</i> | 2004 | In the broad sense to include both lifestyle factors such as diet, tobacco, and alcohol, as well as radiation, infectious agents, and substances in the air, water, and soil.                                                                                                                                 | Broad                 | The relative contribution from the environment toward cancer risk is about 80-90%                                                                                            |
| Clapp & Ozonoff (193)           | 2004 | “Environmental exposure, broadly defined as any exposure from outside the body.”                                                                                                                                                                                                                              | Broad                 | ---                                                                                                                                                                          |
| Danaei et al. (194)             | 2005 | Included urban air pollution and indoor smoke as environmental risks.                                                                                                                                                                                                                                         | Narrow                | 35% of cancer deaths worldwide and 37% of the cancer deaths in high-income countries could be attributed to potentially modifiable lifestyle and environmental risk factors. |
| L. Le Marchand (195)            | 2005 | Including lifestyle, medications, environmental pollutants, radiation, and infectious agents.                                                                                                                                                                                                                 | Broad                 | 50-90% of the variation in risk across individuals can be explained by known environmental risk factors                                                                      |
| Khoury et al. (196)             | 2005 | Modifiable, nongenetic factors.                                                                                                                                                                                                                                                                               | Broad                 | 80-90%                                                                                                                                                                       |
| Christopher P. Wild (197)       | 2005 | Lifestyle (including diet), infections, radiation, natural and man-made chemicals and occupational exposures.<br><br><i>Exposome</i> : Air, water, diet, lifestyle, behavior, metabolism, inflammation and oxidative processes.                                                                               | Broad                 | ---                                                                                                                                                                          |
| Newby & Howard (198)            | 2005 | Involuntary exposure to carcinogens. Involuntary exposure implies that the individual has no control over the level of exposure, for example, exposure by means of the diet or through soil, air and water pollution.                                                                                         | Narrow                | Between 1 and 5% of all cancers are attributable to environmental factors – though states that this may be an underestimate.                                                 |
| Marahatta et al. (199)          | 2005 | All non-genetic factors.                                                                                                                                                                                                                                                                                      | Broad                 | 95% of cancers are attributable to external, environmental factors that act in conjunction with both genetic and acquired susceptibility.                                    |
| Medical dictionary (200)        | 2005 | The complex of physical, chemical, and biotic factors (as climate, soil, and living things) that act upon an organism or an ecological community and ultimately determine its form and survival. Also, the aggregate of social and cultural conditions that influence the life of an individual or community. | Broad                 | ---                                                                                                                                                                          |
| Giarelli & Jacobs (201)         | 2005 | Either all that is external to the nuclear membrane, external to the cellular membrane, or external to the organism.                                                                                                                                                                                          | Broad                 | ---                                                                                                                                                                          |
| Lagiou et al. (202)             | 2005 | Air, water and soil pollutants.                                                                                                                                                                                                                                                                               | Narrow                | 3% Environmental pollution <sup>a</sup><br>5% Occupational factors<br>2% Ionizing & food radiation<br>1% Food additives                                                      |



| Reference                                                          | Year | Definition of environment                                                                                                                                                                                                                                                                 | Narrow/<br>broad def. | Environmentally attributable<br>risk estimate for cancer                                                                                                                                                     |
|--------------------------------------------------------------------|------|-------------------------------------------------------------------------------------------------------------------------------------------------------------------------------------------------------------------------------------------------------------------------------------------|-----------------------|--------------------------------------------------------------------------------------------------------------------------------------------------------------------------------------------------------------|
| Andreas Luch (203)                                                 | 2005 | Tobacco, alcohol, diet, infections and occupational exposures.                                                                                                                                                                                                                            | Broad                 | Over 80% of cancer deaths in Western industrial countries can be attributed to environmental exposures.                                                                                                      |
| Mathews & Parry (204)                                              | 2005 | Environmental pollutants may be defined as chemical substances of human origin in air, water, soil, food or the home environment.                                                                                                                                                         | Narrow                | 5% (5-90%) <sup>d</sup> – only includes childhood cancers                                                                                                                                                    |
| Rothman & Greenland (205)                                          | 2005 | An all-embracing category that represents nongenetic causes.                                                                                                                                                                                                                              | Broad                 | “It is clear on a priori grounds that 100% of any disease is environmentally caused. Thus, Higginson’s estimate of 90% was an underestimate. Similarly, one can show that 100% of any disease is inherited.” |
| AFSSE; the French Agency for Environmental Safety and Health (206) | 2005 | Chemical environment (e.g. pesticides, dioxin); physical environment (e.g. ionizing radiation, UV radiation, radon); viral and bacterial infections.                                                                                                                                      | Broad                 | Some believe that half of cancer cases could be avoided by applying existing etiological knowledge. However, this estimate is widely debated for lack of consensus criteria among the scientific community.  |
| Davies & Hauge (207)                                               | 2006 | Chemical pollutants in air, water, and food.                                                                                                                                                                                                                                              | Narrow                | 5% (2-10%) <sup>d</sup>                                                                                                                                                                                      |
| Environmental Protection Agency (208)                              | 2006 | The sum of all external conditions affecting the life, development and survival of an organism.                                                                                                                                                                                           | Broad                 | ---                                                                                                                                                                                                          |
| Vineis & Berwick (209)                                             | 2006 | <i>Environmental exposures</i> : All changes that occur in the external environment that have the capability of modifying also the internal environment of the cell.                                                                                                                      | Broad                 | ---                                                                                                                                                                                                          |
| P. Boffetta (210)                                                  | 2006 | <i>Broad</i> : All non-genetic factors such as diet, lifestyle and infectious agents.<br><i>Narrow</i> : Only the (natural or man-made) agents encountered by humans in their daily life, upon which they have no or limited personal control. Only air, water, soil and food pollutants. | Narrow                | ---                                                                                                                                                                                                          |
| Hemminki et al. (211)                                              | 2006 | Any influencing factor that is not inherited, including sporadic, random causation of disease.                                                                                                                                                                                            | Broad                 | 75-90% of cancer has thought to be environmental.                                                                                                                                                            |
| Ezzati et al. (212)                                                | 2006 | Includes indoor/outdoor air pollution as environmental.                                                                                                                                                                                                                                   | Narrow                | 35% of cancer deaths worldwide attributable to modifiable and environmental risk factors.                                                                                                                    |
| National Cancer Institute (NCI) (213)                              | 2006 | Everything outside the body that enters and interacts with it – sunshine, radiation, hormones, viruses, bacteria, chemicals in air, water, food, and workplace, lifestyle choices (including smoking and excessive alcohol consumption), an unhealthy diet, or lack of exercise.          | Broad                 | 67% of all cancers attributable to the environment                                                                                                                                                           |
| National Institute of Environmental Health Sciences (NIEHS) (214)  | 2006 | “In the broadest sense, the environment is what is all around you; it consists of the chemicals, foods, drugs, and natural products that you touch, eat, and breathe in everyday life.”                                                                                                   | Broad                 | ---                                                                                                                                                                                                          |

| Reference                                  | Year | Definition of environment                                                                                                                                                                                                                                                                                                                                                                                                                                                                                                                                                                                                                                                                         | Narrow/<br>broad def. | Environmentally attributable<br>risk estimate for cancer                                                                                                              |
|--------------------------------------------|------|---------------------------------------------------------------------------------------------------------------------------------------------------------------------------------------------------------------------------------------------------------------------------------------------------------------------------------------------------------------------------------------------------------------------------------------------------------------------------------------------------------------------------------------------------------------------------------------------------------------------------------------------------------------------------------------------------|-----------------------|-----------------------------------------------------------------------------------------------------------------------------------------------------------------------|
| ACS (215)                                  | 2006 | <i>Environmental factors</i> : tobacco use, poor nutrition, inactivity, obesity, certain infectious agents, certain medical treatments, sunlight, cancer-causing agents that occur naturally in food, cancer-causing agents in the workplace, and cancer-causing agents that exist as pollutants in our air, water, and soil.                                                                                                                                                                                                                                                                                                                                                                     | Broad                 | 75-80% of cancer cases and deaths are due to environmental factors in the broad sense<br>4% occupational exposures<br>2% environmental pollutants                     |
| Enrique Garcia Jorda (216)                 | 2006 | "We understand the word environment as our surround or envelope; just like the scene or sum of the things around us. This envelope affects and determines our lives, and specially the life circumstances of people, or the society as a whole; it contains the sum of natural, social and cultural values of a place in a certain moment, and has an influence on the life of men and the generations to come. It comprises not only the space where life develops but also all living beings, objects, water, ground, air, as well as all relations among them; and also intangible elements, such as cultural aspects." Breaks up the environment into physical, biological and socioeconomic. | Broad                 | 80% of cancers caused by exogenous and environmental factors                                                                                                          |
| Pruss-Ustun & Corvalan (217)<br><i>WHO</i> | 2006 | All the physical, chemical and biological factors external to the human host, and all related behaviors, but not excluding those natural environments that cannot be modified.                                                                                                                                                                                                                                                                                                                                                                                                                                                                                                                    | Broad                 | 19% (12-29%)                                                                                                                                                          |
| Ma & Yu (218)                              | 2006 | Contaminants in the environment, such as indoor air pollution and pesticides.                                                                                                                                                                                                                                                                                                                                                                                                                                                                                                                                                                                                                     | Narrow                | "It is believed that the majority of cancer cases (over 90 percent) are due to the joint effect of genetic variations, environmental factors, and lifestyle choices." |
| Shuler et al. (219)                        | 2006 | Air, water, soil, and food pollutants.                                                                                                                                                                                                                                                                                                                                                                                                                                                                                                                                                                                                                                                            | Narrow                | 5% (2-10%) <sup>d</sup>                                                                                                                                               |
| Soterios A. Kyrtopoulos (220)              | 2006 | All exogenous factors.                                                                                                                                                                                                                                                                                                                                                                                                                                                                                                                                                                                                                                                                            | Broad                 | Environmental factors determine more than 50% of the cancer risk                                                                                                      |
| Boyd & Genuis (221)                        | 2007 | Refers specifically to various forms of adverse environmental exposures such as chemical exposure and pollution, not the broader meaning sometimes used in the medical community to refer to all factors outside of an individual's genetic makeup.                                                                                                                                                                                                                                                                                                                                                                                                                                               | Narrow                | ---                                                                                                                                                                   |
| Boffetta et al. (222)<br><i>IARC</i>       | 2007 | <i>Broad</i> : all non-genetic factors such as diet, lifestyle and infectious agents.<br><br><i>Narrow</i> : Only the natural or man-made agents encountered by humans in their daily life, upon which they have no or limited personal control.<br>Air, water, soil and food pollutants.                                                                                                                                                                                                                                                                                                                                                                                                         | Narrow                | 1-3% of all cancers attributable to the environment (using narrow definition).                                                                                        |
| Saracci & Vineis (223)                     | 2007 | Outdoor air pollution, indoor air pollution from solid fuel-use, lead, water and sanitation/hygiene.                                                                                                                                                                                                                                                                                                                                                                                                                                                                                                                                                                                              | Narrow                | 5.1% of all cancers attributable to just pollutants<br>5.3% due to pollutants and occupational causes                                                                 |
| Anthony B. Miller (224)                    | 2007 | Attribution to manmade factors in "the environment", that is carcinogenic contaminants in air, water, and soil, that may either affect us directly, or through our food supply.                                                                                                                                                                                                                                                                                                                                                                                                                                                                                                                   | Narrow                | ---                                                                                                                                                                   |

| Reference                    | Year | Definition of environment                                                                                                                                                                                                                                                                                                                                                                                                                                                                                                                                                                                                  | Narrow/<br>broad def. | Environmentally attributable<br>risk estimate for cancer                                                                                                                                                                                                                                   |
|------------------------------|------|----------------------------------------------------------------------------------------------------------------------------------------------------------------------------------------------------------------------------------------------------------------------------------------------------------------------------------------------------------------------------------------------------------------------------------------------------------------------------------------------------------------------------------------------------------------------------------------------------------------------------|-----------------------|--------------------------------------------------------------------------------------------------------------------------------------------------------------------------------------------------------------------------------------------------------------------------------------------|
| D. Belpomme (225)            | 2007 | <i>Standard definition</i> : physical, chemical and biotic factors that act on individuals; <i>Geneticists</i> : consider all acquired factors and therefore include lifestyle-related factors among environmental factors; <i>Oncologists</i> : distinguish lifestyle-related factors such as smoking, alcohol consumption and diets, from physical, chemical and biological cancer-causing agents, which may be present in the surroundings of individuals and thus can contribute to carcinogenesis.                                                                                                                    | Broad                 | ---                                                                                                                                                                                                                                                                                        |
| Z. Herceg (226)              | 2007 | Chemical carcinogens, dietary contaminants, and physical carcinogens – tobacco smoke, nickel, aflatoxin B1 (AFB1), arsenic, ionizing radiation, UV radiation, bacteria, and viruses. Distinguishes environmental factors from dietary and lifestyle.                                                                                                                                                                                                                                                                                                                                                                       | Broad                 | ---                                                                                                                                                                                                                                                                                        |
| D. Belpomme et al. (227)     | 2007 | Physical, chemical and biological agents present in the surroundings of individuals.                                                                                                                                                                                                                                                                                                                                                                                                                                                                                                                                       | Broad                 | ---                                                                                                                                                                                                                                                                                        |
| IARC (228)                   | 2007 | Water, air, soil and food pollutants.                                                                                                                                                                                                                                                                                                                                                                                                                                                                                                                                                                                      | Narrow                | 0.1% of all cancers in <i>France</i> attributed to pollutants of the environment <sup>c</sup>                                                                                                                                                                                              |
| Pruss-Ustan & Corvalan (229) | 2007 | The physical, chemical and biologic environment to the human host and related behavior, but only those parts that could be reasonably modified. Includes pollution, radiation, noise, occupational risks, the built environment, land use patterns, agricultural methods and irrigation schemes, and manmade changes to the climate and ecosystems.                                                                                                                                                                                                                                                                        | Broad                 | 19% (12-29%)                                                                                                                                                                                                                                                                               |
| Irigaray et al. (230)        | 2007 | Alcohol consumption, smoking, microorganisms (viruses, bacteria and parasites), radiations (radioactivity, UV and pulsed electromagnetic fields), xenochemicals, outdoor air pollution (carbon particles associated with polycyclic aromatic hydrocarbons), indoor air pollution (environmental tobacco smoke, formaldehyde and volatile organic compounds such as benzene and 1,3 butadiene), food additives, carcinogenic contaminants such as nitrates, pesticides, dioxins and other organochlorines, carcinogenic metals and metalloids, pharmaceutical medicines and some ingredients and contaminants in cosmetics. | Broad                 | Although the risk fraction attributable to environmental factors is still unknown, this long list of carcinogenic and especially mutagenic factors supports our working hypothesis according to which numerous cancers may in fact be caused by the recent modification of our environment |
| R.W. Ruddon (231)            | 2007 | Cigarette smoking, diet, ultraviolet radiation, sexual practices, parasitic and viral infections, industrial pollution, and pesticides.                                                                                                                                                                                                                                                                                                                                                                                                                                                                                    | Broad                 | 60 to 90% of human cancers are attributable to environmental and lifestyle factors.                                                                                                                                                                                                        |
| Jirtle & Skinner (232)       | 2007 | The word 'environment' means vastly different things to different people. For sociologists and psychologists, it conjures up visions of social group interactions, family dynamics and maternal nurturing. Nutritionists might envision food pyramids and dietary supplements, whereas toxicologists think of water, soil and air pollutants.                                                                                                                                                                                                                                                                              | Broad                 | ---                                                                                                                                                                                                                                                                                        |
| Bert Brunekreef (233)        | 2008 | All that surrounds us. This includes the water we drink, the air we inhale, the food we eat, the soil we live on, the buildings we dwell in, the work we do, and the society we are part of. Excluding occupational exposures and the social environment.                                                                                                                                                                                                                                                                                                                                                                  | Broad                 | ---                                                                                                                                                                                                                                                                                        |
| Angela Logomasini (234)      | 2008 | Everything other than genetics. Smoking, diet, occupational exposure to chemicals, and geophysical factors (naturally occurring radiation, man-made radiation, medical drugs and medical radiation, and pollution).                                                                                                                                                                                                                                                                                                                                                                                                        | Broad                 | 80-90% of cancers are caused by environmental factors                                                                                                                                                                                                                                      |

| Reference                                                                    | Year | Definition of environment                                                                                                                                                                                                                                                                                                                                                                                                                             | Narrow/<br>broad def. | Environmentally attributable<br>risk estimate for cancer                                   |
|------------------------------------------------------------------------------|------|-------------------------------------------------------------------------------------------------------------------------------------------------------------------------------------------------------------------------------------------------------------------------------------------------------------------------------------------------------------------------------------------------------------------------------------------------------|-----------------------|--------------------------------------------------------------------------------------------|
| Anand et al. (235)                                                           | 2008 | Includes diet, alcohol, tobacco, obesity, infectious agents, environmental pollutants, and radiation.                                                                                                                                                                                                                                                                                                                                                 | Broad                 | 90-95% of cancer can be attributed to environmental factors                                |
| R.M. Merrill (236)                                                           | 2008 | Inner vs. outer environment; Personal vs. ambient environment: where a person has control or not; Solid, liquid, and gaseous environments: solid, food, water, and air contaminants; Physical, chemical, biological, and psychosocial environments.                                                                                                                                                                                                   | Broad                 | ---                                                                                        |
| I. Hertz-Picciotto (237)                                                     | 2008 | Factors that are exogenous to and nonessential for the normal functioning of human beings and that alter patterns of disease and health. It therefore includes physical, chemical, and biological agents, as well as social, political, cultural, and engineering or architectural factors affecting human contact with such agents.                                                                                                                  | Broad                 | 90-100%                                                                                    |
| Martin-Moreno et al. (238)                                                   | 2008 | Pollutants in the air, water, and soil, as well as radiation.                                                                                                                                                                                                                                                                                                                                                                                         | Narrow                | 5% of cancer incidence in men is attributable to environmental and occupational exposures. |
| Oregon Environmental Council (239)                                           | 2008 | Air, water and soil pollutants, both naturally occurring and anthropogenic. Exposures included within this definition are potentially preventable through application of pollution prevention and public health approaches. This definition of environmental factors does not include diet, smoking, alcohol, sexual behavior, infectious disease, accidents or injuries.                                                                             | Narrow                | 5% (2-10%) <sup>d</sup>                                                                    |
| Miquel Porta (240)<br><i>International Epidemiological Association (IEA)</i> | 2008 | All that which is external to the individual human host. Can be divided into physical, biological, social, cultural, etc., any or all of which can influence the health status of populations.                                                                                                                                                                                                                                                        | Broad                 | ---                                                                                        |
| D.G. Zaridze (241)                                                           | 2008 | Environmental factors include occupation and exposure to carcinogens at the workplace, exogenous hormones, ultraviolet and ionizing radiation.                                                                                                                                                                                                                                                                                                        | Broad                 | 90-95% of cancers are due to environment and lifestyle factors                             |
| National Center for Environmental Health (NCEH) (242)                        | 2009 | Everything around us – the air we breathe, the water we drink and use, and the food we consume. It's also the chemicals, radiation, microbes, and physical forces with which we come into contact.                                                                                                                                                                                                                                                    | Broad                 | ---                                                                                        |
| Cancer Research UK (243)                                                     | 2009 | Pollutants and chemicals in air, water, food, and soil.                                                                                                                                                                                                                                                                                                                                                                                               | Narrow                | 3% of all cancers                                                                          |
| Kumar & Das (244)                                                            | 2009 | Microorganisms (viruses, bacteria and parasites), radiation (radioactivity, UV and pulsed electromagnetic fields), occupational exposures, tobacco smoke, sexual behavior, alcohol, diet, pollutants (in the workplace, air, water, and food supply), formaldehyde, volatile organic compounds such as benzene and 1,3 butadiene and many xenochemicals, carcinogenic metals and metalloids, pharmaceutical medicines, food additives, and cosmetics. | Broad                 | 90-95% of all cancers can be attributed to environmental carcinogens.                      |
| Cancer Care Ontario (245)                                                    | 2009 | Environmental contaminants such as arsenic, radon, chromium, nitrates, solar radiation, and environmental tobacco smoke.                                                                                                                                                                                                                                                                                                                              | Narrow                | It is unknown to what degree environmental carcinogens contribute to the cancer burden.    |
| Vineis & Xun (246)                                                           | 2009 | Pollutants of air, food, water and soil. Excluding tobacco smoking, alcohol, dietary habits, occupational exposures, and infectious or parasitic causes of cancer.                                                                                                                                                                                                                                                                                    | Narrow                | ---                                                                                        |

| Reference                                                | Year | Definition of environment                                                                                                                                                                                                                                                                                                                                                                                                                                                                                                                                           | Narrow/<br>broad def. | Environmentally attributable<br>risk estimate for cancer                                                                                                                                                                     |
|----------------------------------------------------------|------|---------------------------------------------------------------------------------------------------------------------------------------------------------------------------------------------------------------------------------------------------------------------------------------------------------------------------------------------------------------------------------------------------------------------------------------------------------------------------------------------------------------------------------------------------------------------|-----------------------|------------------------------------------------------------------------------------------------------------------------------------------------------------------------------------------------------------------------------|
| Mary E. Davis (247)                                      | 2009 | Air, water, soil, and food pollutants.                                                                                                                                                                                                                                                                                                                                                                                                                                                                                                                              | Narrow                | 5 % (2-10%) <sup>d</sup>                                                                                                                                                                                                     |
| G. Colditz (248)                                         | 2009 | Smoking, diet, reproductive behavior, sexual behavior, infection, and occupational exposures.                                                                                                                                                                                                                                                                                                                                                                                                                                                                       | Broad                 | Cites Doll & Peto's estimates: smoking (30%), diet and lack of physical activity (35%) infections (17%) – 75-80% of cancers.                                                                                                 |
| J. Shen (249)                                            | 2009 | Endogenous and exogenous exposures.<br>Personal lifestyle and behavioral factors.                                                                                                                                                                                                                                                                                                                                                                                                                                                                                   | Broad                 | 75-90% of sporadic cancer is environmentally determined. Up to 90% for all types of cancer                                                                                                                                   |
| Fontham et al. (250)                                     | 2009 | Tobacco use, poor nutrition, physical activity and obesity, alcohol consumption, excessive sun exposure, certain chronic infections, and exposures to other known carcinogens in various settings... 'environmental' in the sense that they are acquired, and potentially controllable, rather than being inherited genetic traits."                                                                                                                                                                                                                                | Broad                 | ---                                                                                                                                                                                                                          |
| The Lancet (251)                                         | 2010 | Toxic chemicals and environmental pollutants found in the air, water, home, and workplace.                                                                                                                                                                                                                                                                                                                                                                                                                                                                          | Narrow                | 6% of US cancer deaths are attributable to occupational and environmental risk factors. <sup>a</sup>                                                                                                                         |
| New Hampshire Department of Environmental Services (252) | 2010 | Chemicals and pollutants.                                                                                                                                                                                                                                                                                                                                                                                                                                                                                                                                           | Narrow                | 75% of cancer mortality can be attributed to behavioral risk factors such as smoking, drinking, and diet. A much smaller proportion of cancer mortality has been linked to environmental factors and pollution. <sup>a</sup> |
| J. Argo (253)                                            | 2010 | Factors closely related to the daily life of humans.                                                                                                                                                                                                                                                                                                                                                                                                                                                                                                                | Broad                 | 80-90% of cancers are caused by environmental carcinogens                                                                                                                                                                    |
| Paolo Boffetta (254)                                     | 2010 | "The term 'environmental factors', with regard to disease causation, is often used in the medical literature to include all non-genetic factors, such as diet, lifestyle and infectious agents. In this broad sense, the environment has been implicated in the causation of the majority of human cancers. But in a more specific sense, environmental factors should include only the natural or man-made agents encountered by humans in their daily life, upon which they have no or limited personal control, including air, water, soil and food pollutants." | Narrow                | ---                                                                                                                                                                                                                          |
| Huchcroft et al. (255)                                   | 2010 | Defined broadly as those that are not a lifestyle choice (such as diet and smoking), are ubiquitous (e.g., ultraviolet radiation and air pollution) and/or involve involuntary exposure (e.g., occupational exposures, industrial pollution and environmental tobacco smoke). Although biological agents are a class of environmental exposures/ hazards, they are not dealt with here.                                                                                                                                                                             | Broad                 | ---                                                                                                                                                                                                                          |
| Ziech et al. (256)                                       | 2010 | Air, water, soil, and food pollutants.                                                                                                                                                                                                                                                                                                                                                                                                                                                                                                                              | Narrow                | ---                                                                                                                                                                                                                          |
| Glaser et al. (257)                                      | 2010 | Chemical pollutants in air, water, and food.                                                                                                                                                                                                                                                                                                                                                                                                                                                                                                                        | Narrow                | 5% (2 -10%) <sup>d</sup>                                                                                                                                                                                                     |

| Reference                                            | Year | Definition of environment                                                                                                                                                                                                                                                                                                                                                                                                                                        | Narrow/<br>broad def. | Environmentally attributable<br>risk estimate for cancer                                                     |
|------------------------------------------------------|------|------------------------------------------------------------------------------------------------------------------------------------------------------------------------------------------------------------------------------------------------------------------------------------------------------------------------------------------------------------------------------------------------------------------------------------------------------------------|-----------------------|--------------------------------------------------------------------------------------------------------------|
| Maryland Department of Health (258)                  | 2010 | Many cancer researchers consider things such as tobacco use, diet, alcohol, a woman's age when she has her first child, lifestyle factors, infections and exposure to sunlight. In this very broad sense, it is likely that a large percentage of cancers are environmental in their origin. However, if environment is defined more narrowly as one's surroundings, then the percentage of cancers that can be attributed to the environment is probably small. | Broad                 | ---                                                                                                          |
| Rappaport & Smith (259)                              | 2010 | Differentiates between internal chemical environment and "external environment" which includes radiation, stress, lifestyle, infections, drugs, diet and pollution                                                                                                                                                                                                                                                                                               | Broad                 | ---                                                                                                          |
| Cancer Research UK (260)                             | 2010 | What is around you each day that may help to cause cancer. This could include: tobacco smoke, the sun, natural and manmade radiation, work place hazards, asbestos.                                                                                                                                                                                                                                                                                              | Broad                 | ---                                                                                                          |
| Agency for Toxic Substances & Disease Registry (261) | 2010 | Everything outside the body that interacts with humans. Lifestyle choices such as cigarette smoking, excessive alcohol consumption, poor diet, lack of exercise, excessive sunlight exposure, and sexual behavior, that increases exposure to certain viruses. Other factors include exposure to certain medical drugs, hormones, radiation, viruses, bacteria, and environmental chemicals possibly present in the air, water, food, and workplace.             | Broad                 | Natural and manufactured substances in the environment accounts for at least two-thirds of all cancer cases. |

<sup>a</sup> Represents mortality not incidence

<sup>b</sup> Represents DALYs not incidence

<sup>c</sup> Estimate only applies to one country (not a global estimate)

<sup>d</sup> Estimate includes only childhood cancers

## References

1. Higginson J, Oettle AG. Cancer incidence in the Bantu and "Cape Colored" races of South Africa: report of a cancer survey in the Transvaal (1953-55). *J Natl Cancer Inst.* 1960;24:589-671.
2. World Health Organization. Technical Report Series. Prevention of Cancer. Geneva: WHO; 1964.
3. Boyland E. The correlation of experimental carcinogenesis and cancer in man. *Prog Exp Tumor Res.* 1969;11:222-34.
4. Higginson J. Environment and cancer. *Practitioner.* 1967;198(187):621-30.
5. Clayson DB. Chemicals and environmental carcinogenesis in man. *Eur J Cancer.* 1967;3(4):405-15.
6. Higginson J. Present trends in cancer epidemiology. *Proc Can Cancer Conf.* 1969;8:40-75.
7. Boyland E. The correlation of experimental carcinogenesis and cancer in man. *Progress in experimental tumor research.* 1969;11:222-34.
8. Epstein SS. Chemical hazards in the human environment. *CA Cancer J Clin.* 1969;19(5):277-81.
9. Harris RJC. Cancer and the environment. *International Journal of Environmental Studies.* 1970;1(1):59-65.
10. Higginson J. International research: its role in environmental biology. *Science.* 1970;170(961):935-9.
11. Fox JP, Hall CE, Elveback ER. *Epidemiology: Man and Disease.* New York Macmillan and Co.; 1970.
12. Epstein SS. Control of chemical pollutants. *Nature.* 1970;228(5274):816-9.
13. Burkitt DP. Cancer and Environment *International Journal of Environmental Studies.* 1971;1(4):275-9.
14. *Cancer and Environment. Scientia.* 1972;107(5-6):509.
15. Hueper WC. Environmental cancer hazards. *Journal of Occupational Medicine.* 1972;14(2):149-53.
16. International Agency for Research on Cancer. *Monographs on the Evaluation of Carcinogenic Risk of Chemicals to Man.* Lyon, France 1972.
17. Payer LJ. IARC: An environmental approach to cancer research. *Science.* 1972;178(4063):844-6.
18. Selikoff IJ, Hammond EC. *Proceedings: Environmental cancer in the year 2000. Proceedings National Cancer Conference.* 1972;7:687-96.
19. Harris RC. Environment and the origin of cancer. *Quintessence international.* 1973;4(9):77-82.
20. Heidelberger C. Current trends in chemical carcinogenesis. *Fed Proc.* 1973;32(12):2154-61.
21. Gillette R. Cancer and Environment .2. Groping for New Remedies. *Science.* 1974;186(4160):242-5.
22. Epstein SS. Environmental determinants of human cancer. *Cancer Res.* 1974;34(10):2425-35.
23. Heidelberger C. Chemical carcinogenesis. *Annual review of biochemistry.* 1975;44:79-121.
24. Hammond EC. The epidemiological approach to the etiology of cancer. *Cancer.* 1975;35(3):652-4.
25. Brown AL. Evaluation of environmental carcinogens for cancer in man. *Oncology.* 1976;33(2):58-60.
26. Doll R. Epidemiology of cancer: current perspectives. *Am J Epidemiol.* 1976;104(4):396-404.
27. DHSS. *Prevention and Health: Everybody's Business. A Reassessment of Public and Personal Health. A Consultative Document prepared jointly by the Health Departments of Great Britain and Northern Ireland.* London: HMSO; 1976.
28. Higginson J, Muir CS. The Role of Epidemiology in Elucidating the Importance of Environmental Factors in Human Cancer *Cancer Detection and Prevention* 1976;1(1):79-105.
29. Weisburger JH. Environmental cancer. *Journal of Occupational Medicine.* 1976;18(4):245-52.
30. Higginson J. A hazardous society? Individual versus community responsibility in cancer prevention. Third annual Matthew B. Rosenhaus Lecture. *Am J Public Health.* 1976;66(4):359-66. PMID: 1653289.
31. Preussmann R. Chemical carcinogens in the human environment; problems and quantitative aspects. *Oncology.* 1976;33(2):51-7.
32. Higginson J. Importance of environmental factors in cancer. *IARC Sci Publ.* 1976(13):15-23.

33. Higginson J, Muir CS. [Determination of the importance of environmental factors in human cancer: the role of epidemiology]. *Bull Cancer*. 1977;64(3):365-84.
34. Train RE. *Environmental Cancer Science*. 1977;195(4277):443-.
35. Wynder EL, Gori GB. Contribution of the environment to cancer incidence: an epidemiologic exercise. *J Natl Cancer Inst*. 1977;58(4):825-32.
36. Doll R. Strategy for detection of cancer hazards to man. *Nature*. 1977;265(5595):589-96.
37. Heidelberger C. Chemical carcinogenesis. *Cancer*. 1977;40(1 Suppl):430-3.
38. National Center for Health Statistics OoR, Statistics, and Technology. Statistics needed for determining the effects of the environment on health: Report of the Technical Consultant Panel to the United States National Committee on Vital and Health Statistics. Hyattsville,MD: National Center for Health Statistics July 1977.
39. Karlsson Y. Is there ground for optimism in cancer prevention? *Nord Med*. 1977;92(11):269-71.
40. World Health Organization. Cancer and Environment. *Who Chronicle*. 1978;32(8):325-.
41. Hoover RN. Detection of environmental cancer hazards: epidemiologic methods. *J MED SOC NJ*. 1978;75(11):746-51.
42. Tomatis I, Agthe C, Bartsh H. Evaluation of the carcinogenicity of chemicals: A Review of the Monograph Program of the International Agency for Research on Cancer (1971 to 1977). *Cancer Res*. 1978;38:877-85.
43. Garry Jr VF. Environmental pathology, target environmental cancer. *Minnesota Medicine*. 1978;61(5):328-30.
44. Brookes P. Environmental Factors and Cancer in Man. *Biologist*. 1978;25(5):189-94.
45. Schneiderman MA. Eighty percent of cancer is related to the environment. *Laryngoscope*. 1978;88(4):559-74.
46. Buffler PA. Statistical and epidemiological considerations in evaluating environmental cancer. *Tex Rep Biol Med*. 1978;37:64-93.
47. Eisenbud M. Environmental causes of cancer. *Environment*. 1978;20(8):6-16.
48. Arcos JC. Cancer - Chemical Factors in the Environment .1. Overview International Laboratory. 1978(SEP-):25.
49. Barnalloyd G. Environmentally Caused Cancers. *Science*. 1978;202(4367):469-.
50. Culliton BJ. Toxic substances legislation: how well are laws being implemented? *Science*. 1978;201(4362):1198-9.
51. Sahyun MRV. *Environment and cancer C&EN*. 1978.
52. Trosko JE, Chang CC. Environmental carcinogenesis: an integrative model. *The Quarterly review of biology*. 1978;53(2):115-41.
53. Thomas HF. Cancer and the Environment *Environmental Health*. 1978;October:232-3.
54. Heath CW. Environmental-Pollutants and the Epidemiology of Cancer. *Environmental Health Perspectives*. 1978;27(DEC):7-10.
55. Fishbein L. *Potential Industrial Carcinogens and Mutagens Amsterdam: Elsevier Scientific Publishing Company* 1979.
56. Albrecht RM. Trends and reliability of data on environmental cancer. *Journal of the Air Pollution Control Association*. 1979;29(1):54-6.
57. Morgan WK. Industrial Carcinogens: the extent of the risk. *Thorax*. 2010;34:431-3.
58. Maugh T. Cancer and Environment - Higginson Speaks Out *Science*. 1979;205(4413):1363-&.
59. Cavallo G. Cancer and environment. *G Bacteriol Virol Immunol*. 1979;71(1-6):26-33.
60. Gori GB. Dietary and nutritional implications in the multifactorial etiology of certain prevalent human cancers. *Cancer*. 1979;43(5 Suppl):2151-61.
61. Higginson J, Muir CS. Environmental carcinogenesis: Misconceptions and limitations to cancer control. *Journal of the National Cancer Institute*. 1979;63(6):1291-8.
62. Hoover R. *Environmental Cancer Annals of the New York Academy of Sciences*. 1979;329(OCT):50-60.
63. Higginson J. Perspectives and future developments in research on environmental carcinogenesis. In: Griffin AC, Shaw CR, editors. *Carcinogens: Identification and Mechanism of Action*. New York: Raven Press 1979.
64. *Link Between Cancer and Environment: Experts View Civil Engineering*. 1979;49(9):79-80.
65. Morgan WK. Industrial carcinogens: the extent of the risk. *Thorax*. 1979;34(4):431-3. PMID: 471091.



66. Cimino JA, Demopoulos HB. Cancer and the environment. Introduction: determinants of cancer relevant to prevention, in the war on cancer. *Journal of Environmental Pathology and Toxicology*. 1980;3(4 Spec No):1-10.
67. Slaga TJ. Cancer: etiology, mechanisms, and prevention--a summary. *Carcinogenesis; a comprehensive survey*. 1980;5:243-62.
68. Higginson J. Proportion of cancers due to occupation. *Prev Med*. 1980;9(2):180-8.
69. Harris CC, Mulvihill JJ, Thorgeirsson SS, Minna JD. Individual differences in cancer susceptibility. *Ann Intern Med*. 1980;92(6):809-25.
70. Whelan EM. Cancer and the Environment - Fact vs Fiction *Mining Congress Journal*. 1980;66(1):17-&.
71. Higginson J. Implications for future studies in humans. *Ciba Found Symp*. 1980;76:349-58.
72. Wynder EL. The environment and cancer prevention. *Journal of Environmental Pathology and Toxicology*. 1980;3(4):171-92.
73. Higginson J. The environment and cancer. *American Journal of Medicine*. 1980;69(6):811-3.
74. Doll R, Peto R. The causes of cancer: quantitative estimates of avoidable risks of cancer in the United States today. *J Natl Cancer Inst*. 1981;66(6):1191-308.
75. Badger G. Environmental Factors in Human Cancer Search. 1981;12(1-2):22-9.
76. Bundy M. When are studies adequate for regulatory purposes? View of one regulated. *Environmental Health Perspectives*. 1981;42:67-72.
77. Higginson J. Rethinking the environmental causation of human cancer. *Food and Cosmetics Toxicology*. 1981;19(5):539-48.
78. United States Congress Office of Technology Assessment. *Assessment of Technologies for Determining Cancer Risks from the Environment* Washington, D.C. : U.S. Government Printing Office; 1981.
79. Crombie IK. The limitations of case-control studies in the detection of environmental carcinogens. *J Epidemiol Community Health*. 1981;35(4):281-7. PMID: 1052178.
80. Langard S. [What proportion of environment-induced cancer in Norway can be prevented?]. *Tidsskr Nor Laegeforen*. 1981;101(28):1602-6.
81. Austin DF. Epidemiologic and environmental aspects of cancer. *Frontiers of radiation therapy and oncology*. 1980;15:5-17.
82. Greenberg ER, Meier FA. Environmental causes of cancer death. *American Journal of Forensic Medicine and Pathology*. 1982;3(4):309-13.
83. Lilienfeld AM. Some aspects of cancer epidemiology. *Biometrics*. 1982;38 Suppl:155-65.
84. McKenna RJ. Applied cancer prevention in practice. *Cancer*. 1983;51(12 Suppl):2430-9.
85. Committee on Diet N, and Cancer, National Research Council. *Diet, Nutrition, and Cancer* Washington, D.C. : National Academy Press 1982.
86. Kraybill HF. Assessment of Human Exposure and Health Risk to Environmental Contaminants in the Atmosphere and Water with Special Reference to Cancer *Journal of Environmental Science and Health Part C-Environmental Carcinogenesis Reviews*. 1983;1(2):175-232.
87. Weisburger JH, Horn C. Nutrition and cancer: mechanisms of genotoxic and epigenetic carcinogens in nutritional carcinogenesis. *Bull N Y Acad Med*. 1982;58(3):296-312. PMID: 1805336.
88. Higginson J. Multifactorial carcinogenesis: implications for regulatory practice. *Environ Health Perspect*. 1983;50:23-6. PMID: 1569208.
89. Ernster VL. The Measurement of Associations Between Environmental Exposures and Cancer *American Statistician*. 1983;37(4):420-6.
90. Hirono I. [Problems of environmental carcinogenesis]. *Gan To Kagaku Ryoho*. 1983;10(10):2085-92.
91. Higginson J. Developing concepts on environmental cancer: The role of geographical pathology. *Environmental Mutagenesis*. 1983;5(6):929-40.
92. Hardy JD. Is (Almost) All Cancer Environmental. *World Journal of Surgery*. 1983;7(1):176-7.
93. Nicholson WJ. Research issues in occupational and environmental cancer. *Arch Environ Health*. 1984;39(3):190-202.
94. Neuberger JS, Chin TD. Application of epidemiology to the study of environmental carcinogens. *Reviews on Environmental Health*. 1984;4(2):147-59.
95. Ramel C. General environmental modifiers of carcinogenesis. *Acta pharmacologica et toxicologica*. 1984;55 Suppl 2:181-96.
96. Muir CS, Parkin DM. The world cancer burden: prevent or perish. *Br Med J (Clin Res Ed)*. 1985;290(6461):5-6. PMID: 1415358.
97. Knudson AG, Jr. Hereditary cancer, oncogenes, and antioncogenes. *Cancer Res*. 1985;45(4):1437-43.

98. Garfinkel L. Preventing cancer. *Stat Bull Metrop Insur Co.* 1986;67(2):13.
99. Kupchella CE. Environmental factors in cancer etiology. *Seminars in Oncology Nursing.* 1986;2(3):161-9.
100. Schottenfeld D. Genetic and environmental factors in human carcinogenesis. *J Chronic Dis.* 1986;39(12):1021-30.
101. O'Neill IK, Fishbein L. An IARC Manual series aimed at assisting cancer epidemiology and prevention. "Environmental carcinogens: selected methods of analysis". *International journal of environmental analytical chemistry.* 1986;26(3-4):229-40.
102. Higginson J. Everything is a carcinogen? *Regul Toxicol Pharmacol.* 1987;7(1):89-95.
103. Mulvihill JJ, Tulinius H. Cancer ecogenetics: Studying genetic and environment interactions through epidemiology. *International Journal of Epidemiology.* 1987;16(3):337-40.
104. Weinstein IB. The origins of human cancer: molecular mechanisms of carcinogenesis and their implications for cancer prevention and treatment--twenty-seventh G.H.A. Clowes memorial award lecture. *Cancer Res.* 1988;48(15):4135-43.
105. Sugimura T. New environmental carcinogens in daily life. *Trends Pharmacol Sci.* 1988;9(6):205-9.
106. Higginson J. Changing concepts in cancer prevention: limitations and implications for future research in environmental carcinogenesis. *Cancer Res.* 1988;48(6):1381-9.
107. Swanson GM. Cancer Prevention in the Workplace and Natural-Environment - a Review of Etiology, Research Design, and Methods of Risk Reduction. *Cancer.* 1988;62(8):1725-46.
108. Tomatis L. Environmental cancer risk factors. A review. *Acta Oncologica.* 1988;27(5):465-72.
109. Gough M. Estimating Cancer Mortality: Epidemiological and toxicological methods produce similar assessments *Environmental Science Technology* 1989;23(8):925-30.
110. Perera FP, Boffetta P, Nisbet IC. What are the major carcinogens in the etiology of human cancer? *Industrial carcinogens. Important advances in oncology.* 1989:249-65.
111. Krishna Murti CR. Environmental cancer in the Indian context--an overview. *Indian J Cancer.* 1989;26(2):102-14.
112. Neuberger JS. Control of environment, exposure key to reducing occupational cancer. *Occupational health & safety (Waco, Tex).* 1990;59(4):90-2, 4.
113. Tran Ba Loc P. The environment and cancer. *J Environ Pathol Toxicol Oncol.* 1990;10(6):273-5.
114. Shields PG, Harris CC. Environmental causes of cancer. *Medical Clinics of North America.* 1990;74(2):263-77.
115. Chu MM, Chiu A. Environmental carcinogenesis and biotechnology. *J Biotechnol.* 1990;16(1-2):17-35.
116. Augustin J, Zejda R. Cancer Incidence and Geochemical Factors in the Environment. *Science of the Total Environment.* 1991;106(1-2):155-63.
117. Knudson AG. Heredity and environment in the origin of cancer. *Progress in clinical and biological research.* 1992;376:31-40.
118. Doll R. Health and the environment in the 1990s. *Am J Public Health.* 1992;82(7):933-41. PMID: 1694071.
119. Kreuter MW. Human behavior and cancer. Forget the magic bullet! *Cancer.* 1993;72(3 Suppl):996-1001.
120. Higginson J, Muir C, Munoz N. *Epidemiology And Environmental Causes: Cambridge Univ Pr* 1992.
121. McMillan SC. Carcinogenesis. *Seminars in Oncology Nursing.* 1992;8(1):10-9.
122. Moller H. Occurrence of carcinogens in the external environment: epidemiological investigations. *Pharmacol Toxicol.* 1993;72 Suppl 1:39-45.
123. Higginson J. Environmental carcinogenesis. *Cancer.* 1993;72(3 Suppl):971-7.
124. Epstein SS. Evaluation of the national cancer program and proposed reforms. *Int J Health Serv.* 1993;23(1):15-44.
125. Cohen FB, Cohen AJ, Sabnani I. The environment and cancer in New Jersey. *N J Med.* 1994;91(10):698-700.
126. Inskip H. Cancer and the environment. *J R Soc Health.* 1994;114(3):157-61.
127. Venitt S. Mechanisms of carcinogenesis and individual susceptibility to cancer. *Clin Chem.* 1994;40(7 Pt 2):1421-5.
128. Davis DL, Muir C. Estimating avoidable causes of cancer. *Environ Health Perspect.* 1995;103 Suppl 8:301-6. PMID: 1518970.
129. Health Canada. Human health and the environment. *Environmental Health Strategy Presentation of the Science Advisory Board, September 22, 1999; 1999.*
130. Kardinal CG. Cancer. A potentially preventable disease. *J La State Med Soc.* 1995;147(4):147-8.
131. Olshan AF. Lessons learned from epidemiologic studies of environmental exposure and genetic disease. *Environ Mol Mutagen.* 1995;25 Suppl 26:74-80.

132. Vainio H, Husgafvel-Pursiainen K. Mechanisms of carcinogenesis and molecular epidemiology. *Br J Hosp Med.* 1996;56(4):162-70.
133. Doll R. Nature and nurture: possibilities for cancer control. *Carcinogenesis.* 1996;17(2):177-84.
134. Malpas JS. Chapter 3 Environmental causes of cancer. *Advances in Oncobiology.* 1996;1(C):61-78.
135. Collins F, Klausner R, Olden K. Testimony on Sciences on Cancer, Genetics and the Environment Senate Committee on Labor and Human Resources 1996.
136. Bartsch H, Hietanen E. The role of individual susceptibility in cancer burden related to environmental exposure. *Environ Health Perspect.* 1996;104 Suppl 3:569-77. PMID: 1469659.
137. Harvard report on cancer prevention. Causes of human cancer. Environmental pollution. *Cancer Causes Control.* 1996;7 Suppl 1:S37-8.
138. Trichopoulos D, Li FP, Hunter DJ. What causes cancer? *Scientific American.* 1996;275(3):80-7.
139. Karaer F. Environmental pollution and carcinogenic risk. *J Environ Pathol Toxicol Oncol.* 1996;15(2-4):105-13.
140. Woodward A, Boffetta P. Environmental exposure, social class, and cancer risk. *IARC Sci Publ.* 1997(138):361-7.
141. Ahlbom A, Lichtenstein P, Malmstrom H, Feychting M, Hemminki K, Pedersen NL. Cancer in twins: genetic and nongenetic familial risk factors. *J Natl Cancer Inst.* 1997;89(4):287-93.
142. Thomas SP, Hrudefy SE. Risk of Death in Canada: What We Know and How We Know It. . Edmonton University of Alberta Press 1997.
143. Higginson J. From geographical pathology to environmental carcinogenesis: a historical reminiscence. *Cancer Lett.* 1997;117(2):133-42.
144. Perera FP. Environment and cancer: who are susceptible? *Science.* 1997;278(5340):1068-73.
145. World Health Organization. Health and Environment in Sustainable Development: Five Years after the Earth Summit. Geneva 1997 June Contract No.: Document Number].
146. Doll R. Epidemiological evidence of the effects of behaviour and the environment on the risk of human cancer. *Recent Results Cancer Res.* 1998;154:3-21.
147. Higginson J. The International Agency for Research on Cancer. A brief review of its history, mission, and program. *Toxicol Sci.* 1998;43(2):79-85.
148. Perera FP. Molecular epidemiology of environmental carcinogenesis. Recent results in cancer research *Fortschritte der Krebsforschung Progr?s dans les recherches sur le cancer.* 1998;154:39-46.
149. Ames BN, Gold LS. The prevention of cancer. *Drug Metab Rev.* 1998;30(2):201-23.
150. Armstrong BK, Boffetta P. Environmental Cancer. In: Stellman JM, editor. *Encyclopaedia of Occupational Health and Safety* Fourth ed. Geneva International Labour Office; 1998.
151. Smith KR, Corvalan CF, Kjellstrom T. How much global ill health is attributable to environmental factors? *Epidemiology.* 1999;10(5):573-84.
152. Minamoto T, Mai M, Ronai Z. Environmental factors as regulators and effectors of multistep carcinogenesis. *Carcinogenesis.* 1999;20(4):519-27.
153. Tominaga S. Major avoidable risk factors of cancer. *Cancer Lett.* 1999;143 Suppl 1:S19-23.
154. Verkasalo PK, Kaprio J, Koskenvuo M, Pukkala E. Genetic predisposition, environment and cancer incidence: A nationwide twin study in Finland, 1976-1995. *International Journal of Cancer.* 1999;83(6):743-9.
155. Lichter RS, Rothman S. *Environmental Cancer - A Political Disease?* . Chelsea Yale University Press; 1999.
156. Lichtenstein P, Holm NV, Verkasalo PK, Iliadou A, Kaprio J, Koskenvuo M, et al. Environmental and heritable factors in the causation of cancer: Analyses of cohorts of twins from Sweden, Denmark, and Finland. *New England Journal of Medicine.* 2000;343(2):78-85.
157. Barrett JC. Molecular and environmental causes of cancer. *Drug Metab Rev.* 2000;32(2):139-42.
158. Perera FP. Molecular epidemiology: on the path to prevention? *J Natl Cancer Inst.* 2000;92(8):602-12.
159. American Cancer Society. *Cancer Facts & Figures 2000.* Atlanta; 2000 Contract No.: Document Number].
160. Perera FP, Weinstein IB. Molecular epidemiology: recent advances and future directions. *Carcinogenesis.* 2000;21(3):517-24.
161. Orellana C. Environmental pollutants that cause cancer. *Lancet Oncology.* 2001;2(11):650-.
162. Hayes RB. Gene-environment interrelations in prostate cancer. *Epidemiol Rev.* 2001;23(1):163-7.
163. Adami HO, Day NE, Trichopoulos D, Willett WC. Primary and secondary prevention in the reduction of cancer morbidity and mortality. *Eur J Cancer.* 2001;37 Suppl 8:S118-27.
164. Tomatis L, Melnick RL, Haseman J, Barrett JC, Huff J. Alleged 'misconceptions' distort perceptions of environmental cancer risks. *Faseb Journal.* 2001;15(1):195-203.

165. Dreyer L, Winther JF, Olsen J. Avoidable deaths from cancer in the Nordic countries around the year 2000. *Scand J Public Health*. 2001;29(4):318-9.
166. Melse JM, de Hollander AEM. Human Health and the Environment. Background Document for the OECD Environmental Outlook Paris: OECD; 2001.
167. Wang L, Chen SJ. Environment, genome and cancer. *C R Acad Sci III*. 2001;324(12):1085-91.
168. Hemminki K, Lonnstedt I, Vaittinen P, Lichtenstein P. Estimation of genetic and environmental components in colorectal and lung cancer and melanoma. *Genet Epidemiol*. 2001;20(1):107-16.
169. Montesano R, Hall J. Environmental causes of human cancers. *Eur J Cancer*. 2001;37 Suppl 8:S67-87.
170. Landrigan PJ, Schechter CB, Lipton JM, Fahs MC, Schwartz J. Environmental pollutants and disease in American children: Estimates of morbidity, mortality, and costs for lead poisoning, asthma, cancer, and developmental disabilities. *Environmental Health Perspectives*. 2002;110(7):721-8.
171. Willett WC. Balancing life-style and genomics research for disease prevention. *Science*. 2002;296(5568):695-8.
172. Davis DL, Webster PS. The social context of science: Cancer and the environment. *Annals of the American Academy of Political and Social Science*. 2002;584:13-34.
173. Carpenter DO, Arcaro K, Spink DC. Understanding the human health effects of chemical mixtures. *Environ Health Perspect*. 2002;110 Suppl 1:25-42. PMID: 1241145.
174. Migliore L, Coppede F. Genetic and environmental factors in cancer and neurodegenerative diseases. *Mutat Res*. 2002;512(2-3):135-53.
175. Institute of Medicine. Cancer and the Environment: Gene-Environment Interaction. Wilson S, Jones L, Coussens C, Hanna aK, editors. Washington, DC: National Academy Press 2002.
176. Stewart B. Environmental carcinogens in New South Wales. *N S W Public Health Bull*. 2002;13(9-10):197-8.
177. Czene K, Lichtenstein P, Hemminki K. Environmental and heritable causes of cancer among 9.6 million individuals in the Swedish Family-Cancer Database. *International Journal of Cancer*. 2002;99(2):260-6.
178. Linet MS, Wacholder S, Zahm SH. Interpreting epidemiologic research: lessons from studies of childhood cancer. *Pediatrics*. 2003;112(1 Pt 2):218-32.
179. Vermont Department of Health. Monitoring Cancer in Vermont. Burlington. 2003. [http://healthvermont.gov/prevent/cancer/monitor\\_cancer.aspx](http://healthvermont.gov/prevent/cancer/monitor_cancer.aspx) (accessed December 14, 2010).
180. Briggs D. Environmental pollution and the global burden of disease. *British Medical Bulletin*. 2003;68:1-24.
181. Dix D. On the role of genes relative to the environment in carcinogenesis. *Mech Ageing Dev*. 2003;124(3):323-32.
182. Kreiger N, Ashbury FD, Purdue MP, Marrett LD. Workshop report: environmental exposures and cancer prevention. *Environ Health Perspect*. 2003;111(1):105-8. PMID: 1241313.
183. Boffetta P, Nyberg F. Contribution of environmental factors to cancer risk. *British Medical Bulletin*. 2003;68:71-94.
184. Rushton L. How much does the environment contribute to cancer? *Occup Environ Med*. 2003;60(2):150-6; quiz 6, 80. PMID: 1740471.
185. Massey R, Ackerman F. Costs of Preventable Childhood Illness: The Price We Pay for Pollution Global Development and Environment Institute Tufts University, Medford, MA. 2003.
186. Stewart B, Kleihues P. *World Cancer Report* Lyon, France: IARC Press 2003.
187. Boffetta P. Epidemiology of environmental and occupational cancer. *Oncogene*. 2004;23(38):6392-403.
188. Wogan GN, Hecht SS, Felton JS, Conney AH, Loeb LA. Environmental and chemical carcinogenesis. *Semin Cancer Biol*. 2004;14(6):473-86.
189. Kolonel LN, Altshuler D, Henderson BE. The multiethnic cohort study: exploring genes, lifestyle and cancer risk. *Nat Rev Cancer*. 2004;4(7):519-27.
190. Parkin DM. International variation. *Oncogene*. 2004;23(38):6329-40.
191. Terracini B. The role of primary prevention. *Epidemiol Prev*. 2004;28(2 Suppl):102-12.
192. Nelson N. The Majority of Cancers are Linked to the Environment Benchmarks. 2004: Available from: <http://benchmarks.cancer.gov/2004/06/the-majority-of-cancers-are-linked-to-the-environment/>.
193. Clapp RW, Ozonoff D. Environment and health: vital intersection or contested territory? *Am J Law Med*. 2004;30(2-3):189-215.
194. Danaei G, Vander Hoorn S, Lopez AD, Murray CJ, Ezzati M. Causes of cancer in the world: comparative risk assessment of nine behavioural and environmental risk factors. *Lancet*. 2005;366(9499):1784-93.

195. Le Marchand L. The predominance of the environment over genes in cancer causation: Implications for genetic epidemiology. *Cancer Epidemiology Biomarkers & Prevention*. 2005;14(5):1037-9.
196. Khoury MJ, Davis R, Gwinn M, Lindegren ML, Yoon P. Do we need genomic research for the prevention of common diseases with environmental causes? *Am J Epidemiol*. 2005;161(9):799-805.
197. Wild CP. Complementing the genome with an "exposome": the outstanding challenge of environmental exposure measurement in molecular epidemiology. *Cancer Epidemiol Biomarkers Prev*. 2005;14(8):1847-50.
198. Newby JA, Howard CV. Environmental influences in cancer aetiology. *Journal of Nutritional and Environmental Medicine*. 2005;15(2-3):56-114.
199. Marahatta SB, Sharma N, Kaju R, Makaju RK, Petmitr P, Petmitr S. Cancer: determinants and progression. *Nepal Medical College journal : NMCJ*. 2005;7(1):65-71.
200. 5th ed. New York Lippincott, Williams & Williams 2005. *Stedman's Medical Dictionary for the Health Professions and Nursing*.
201. Giarelli E, Jacobs LA. Modifying Cancer Risk Factors: The Gene-Environment Interaction. *Seminars in Oncology Nursing*. 2005;21(4):271-7.
202. Lagiou P, Adami HO, Trichopoulos D. Causality in cancer epidemiology. *Eur J Epidemiol*. 2005;20(7):565-74.
203. Luch A. Nature and nurture - lessons from chemical carcinogenesis. *Nat Rev Cancer*. 2005;5(2):113-25.
204. Mathews I, Parry S. *The Burden of Disease Attributable to Environmental Pollution*. University of Wales College of Medicine, Cardiff. 2005.
205. Rothman KJ, Greenland S. Causation and causal inference in epidemiology. *Am J Public Health*. 2005;95 Suppl 1:S144-50.
206. AFSSE; the French Agency for Environmental Safety and Health. *Cancer: A methodological approach for studying the link between cancer and the environment*. Paris 2005.
207. Davies K. Economic costs of childhood diseases and disabilities attributable to environmental contaminants in Washington State, USA. *Ecohealth*. 2006;3(2):86-94.
208. Agency USEP. EPA Terms of Environment: Glossary, Abbreviations and Acronyms. 2006 [updated 2006; cited]; Available from: <http://www.epa.gov/OCEPAterms/eterms.html>.
209. Vineis P, Berwick M. The population dynamics of cancer: a Darwinian perspective. *Int J Epidemiol*. 2006;35(5):1151-9.
210. Boffetta P. Human cancer from environmental pollutants: The epidemiological evidence. *Mutation Research - Genetic Toxicology and Environmental Mutagenesis*. 2006;608(2):157-62.
211. Hemminki K, Lorenzo Bermejo J, Forsti A. The balance between heritable and environmental aetiology of human disease. *Nat Rev Genet*. 2006;7(12):958-65.
212. Ezzati M, Hoorn SV, Lopez AD, Danaei G, Rodgers A, Mathers CD, et al. Comparative Quantification of Mortality and Burden of Disease Attributable to. 2006.
213. National Cancer Institute. What is the Environment 2006 [updated 2006]; Available from: <http://www.cancer.gov/cancertopics/understandingcancer/environment/page2> (accessed December 10, 2010).
214. National Institute of Environmental Health Sciences. *New Frontiers in Environmental Sciences and Human Health: NIEHS 2006-2011 Strategic Plan 2006*.
215. American Cancer Society. *Cancer Facts & Figures 2006 Atlanta; 2006 Contract No.: Document Number*].
216. Jordá E. Cancer and environment. *Clinical and Translational Oncology*. 2006;8(7):463-5.
217. Pruss-Ustun A, Corvalan C. Preventing disease through healthy environments. Towards an estimate of the environmental burden of disease. . World Health Organization 2006
218. Ma X, Yu H. Global burden of cancer. *Yale Journal of Biology and Medicine*. 2006;79(3-4):85-94.
219. Shuler K, Nordbye S, Yamin S, Ziebold C. *The Price of Pollution: Cost Estimates of Environment-Related Disease in Minnesota*. . Institute for Agricultural and Trade Policy and Minnesota Center for Environmental Advocacy, Minneapolis 2006.
220. Kyrtopoulos SA. Biomarkers in environmental carcinogenesis research: striving for a new momentum. *Toxicol Lett*. 2006;162(1):3-15.
221. Boyd DR, Genuis SJ. The environmental burden of disease in Canada: respiratory disease, cardiovascular disease, cancer, and congenital affliction. *Environ Res*. 2008;106(2):240-9.
222. Boffetta P, McLaughlin JK, La Vecchia C. 'Environment' in cancer causation and etiological fraction: limitations and ambiguities (by Boffetta,P. et al. (2007) *Carcinogenesis*, 28, 913-915). *Carcinogenesis*. 2008;29(9):1850.
223. Saracci R, Vineis P. Disease proportions attributable to environment. *Environ Health*. 2007;6:38. PMID: 2169214.
224. Miller AB. Environment and cancer - How can the ecological study help us? *Preventive Medicine*. 2007;45(5):325-6.

225. Belpomme D. Cancer and the environment: Facts, figures, methods and misinterpretations. *Biomed Pharmacother.* 2007;61(10):611-3.
226. Herceg Z. Epigenetics and cancer: Towards an evaluation of the impact of environmental and dietary factors. *Mutagenesis.* 2007;22(2):91-103.
227. Belpomme D, Irigaray P, Hardell L, Clapp R, Montagnier L, Epstein S, et al. The multitude and diversity of environmental carcinogens. *Environmental Research.* 2007;105(3):414-29.
228. IARC (International Agency for Research on Cancer). Attributable causes of cancer in France in the year 2000. Lyon; 2007.
229. Pruss-Ustun A, Corvalan C. How much disease burden can be prevented by environmental interventions? *Epidemiology.* 2007;18(1):167-78.
230. Irigaray P, Newby JA, Clapp R, Hardell L, Howard V, Montagnier L, et al. Lifestyle-related factors and environmental agents causing cancer: An overview. *Biomedicine & Pharmacotherapy.* 2007;61(10):640-58.
231. Ruddon RW. *Cancer Biology* 4th ed. New York Oxford University Press 2007.
232. Jirtle RL, Skinner MK. Environmental epigenomics and disease susceptibility. *Nat Rev Genet.* 2007;8(4):253-62.
233. Brunekreef B. Environmental epidemiology and risk assessment. *Toxicol Lett.* 2008;180(2):118-22.
234. Logomasini A. *The True Causes of Cancer.* Competitive Enterprise Institute 2008.
235. Anand P, Kunnumakkara AB, Sundaram C, Harikumar KB, Tharakan ST, Lai OS, et al. Cancer is a preventable disease that requires major lifestyle changes. *Pharmaceutical research.* 2008;25(9):2097-116.
236. Merrill RM. *Environmental Epidemiology: Principles and Methods* Sudbury, MA: Jones and Bartlett Publishers 2008.
237. Hertz-Picciotto I. *Environmental Epidemiology* 3rd ed. Rothman KJ, Greenland S, Lash TL, editors. Philadelphia: Lippincott Williams & Wilkins 2008.
238. Martin-Moreno JM, Soerjomataram I, Magnusson G. Cancer causes and prevention: a condensed appraisal in Europe in 2008. *Eur J Cancer.* 2008;44(10):1390-403.
239. Hackenmiller-Paradis R, Oregon Environmental Council. . The Price of Pollution: Costs of Environmentally-Related Disease in Oregon Portland; 2008 Contract No.: Document Number].
240. Porta M. *A Dictionary of Epidemiology.* Fifth ed. Association IE, editor. New York Oxford University Press 2008.
241. Zaridze DG. Molecular epidemiology of cancer. *Biochemistry (Mosc).* 2008;73(5):532-42.
242. National Center for Environmental Health. Environmental Health: About NCEH Atlanta; 2009. <http://www.cdc.gov/nceh/information/about.htm> (accessed December 18, 2010).
243. Cancer Research UK. Harmful substances - chemicals, pollution and cancer. London; 2009. <http://info.cancerresearchuk.org/healthyliving/harmfulsubstances/> (accessed December 20, 2010).
244. Kumar R, Das B. Role of Environmental Factors in Carcinogenesis. *Environ We Int J Sci Tech.* 2009;4:53-69.
245. Cancer Care Ontario. Occupation and Environment Toronto; 2009. <http://www.cancercare.on.ca/pcs/prevention/occenviro/> (accessed December 20, 2010).
246. Vineis P, Xun W. The emerging epidemic of environmental cancers in developing countries. *Ann Oncol.* 2009;20(2):205-12.
247. Davis ME. An Economic Cost Assessment of Environmentally-Related Childhood Diseases in Maine 2009 Contract No.: Document Number].
248. Colditz GA. Cancer and the Environment: The American Cancer Society Prevention Priorities. *Ca-a Cancer Journal for Clinicians.* 2009;59(6):341-2.
249. Chen J. Evaluation of Environmental and Personal Susceptibility Characteristics That Modify Genetic Risks. In: Verma M, editor. *Methods in Molecular Biology, Cancer Epidemiology.* Totowa, NJ: Humana Press, a part of Springer Science + Business Media; 2009.
250. Fontham ET, Thun MJ, Ward E, Portier KM, Balch AJ, Delancey JO, et al. American Cancer Society perspectives on environmental factors and cancer. *CA Cancer J Clin.* 2009;59(6):343-51.
251. Preventable cancer in the USA. *Lancet.* 2010;375(9727):1665.
252. New Hampshire Department of Environmental Services. *Cancer and the Environment In: Program EH,* editor. Concord 2010.
253. Argo J. Chronic diseases and early exposure to airborne mixtures: Part III. Potential origin of pre-menopausal breast cancers. *J Expo Sci Environ Epidemiol.* 2010;20(2):147-59.
254. Boffetta P. Environmental Pollutants and Cancer: Assessing the Risk. *Cancer Prevention [serial on the Internet].* 2010; (16).  
[http://www.nypcancerprevention.com/issue/16/cancer\\_prevention/feature/environmental\\_pollutants.shtml](http://www.nypcancerprevention.com/issue/16/cancer_prevention/feature/environmental_pollutants.shtml) (accessed December 13, 2010).
255. Huchcroft SA, Mao Y, Semenciw R. Cancer and the environment: Ten topics in environmental cancer epidemiology in Canada. *Chronic Dis Can.* 2010;29 Suppl 1:1-35.

256. Ziech D, Franco R, Pappa A, Malamou-Mitsi V, Georgakila S, Georgakilas AG, et al. The role of epigenetics in environmental and occupational carcinogenesis. *Chemico-Biological Interactions*. 2010;188(2):340-9.
257. Glaser A, Easthope T, Trasande L, Schettler T, Weil W, Howe G. The Price of Pollution: Cost Estimates of Environment-Related Childhood Disease in Michigan. Michigan Network for Children's Environmental Health and the Ecology Center. 2010.
258. Maryland Department of Health and Mental Hygiene Family Health Administration. Maryland Cancer Registry - FAQs. Baltimore; 2011. [http://fha.maryland.gov/cancer/mcr\\_faq.cfm](http://fha.maryland.gov/cancer/mcr_faq.cfm) (accessed December 20, 2010).
259. Rappaport SM, Smith MT. Epidemiology. Environment and disease risks. *Science*. 2010;330(6003):460-1.
260. Cancer Research UK. Your Environment and Cancer London; 2010 [updated 2010]. <http://www.cancerhelp.org.uk/about-cancer/causes-symptoms/causes/your-environment-and-cancer> (accessed December 13, 2010).
261. Agency for Toxic Substances & Disease Registry. What you Need to Know. What You Can Do. What causes cancer? 2010 <http://www.atsdr.cdc.gov/risk/cancer/cancer-causes.html> (accessed December 13, 2010).
